# Supplementary material
Source: PubMed Central journal article supplement (PMC4655559)
Supplement: pnas.1518493112.sapp.pdf [file pnas.1518493112.sapp.pdf]

**High resolution structures of the M2 proton channel from influenza A virus reveal dynamic pathways for proton stabilization and transduction.**

Authors: Jessica L. Thomaston, Mercedes Alfonso-Prieto, Rahel A. Woldeyes, James S. Fraser, Michael L. Klein, Giacomo Fiorin, William F. DeGrado

**Supplementary Information Appendix**

Top-down view of the M2TM cryo high pH structure:

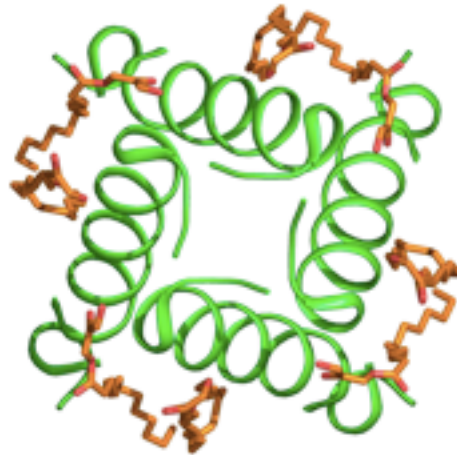

Side view of three M2TM tetramers within the crystal lattice:

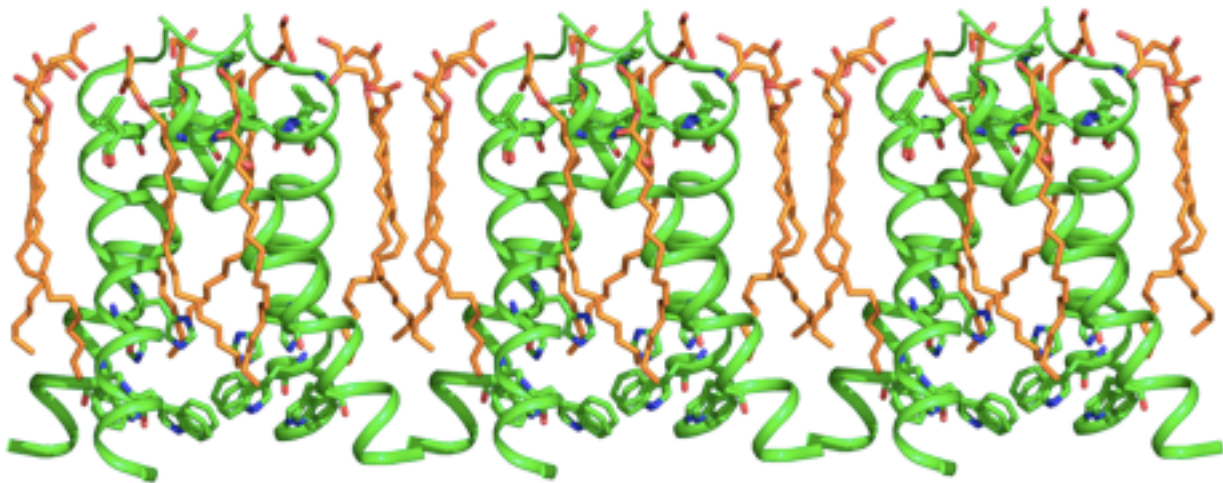

**Figure S1. M2 is surrounded by monoolein molecules.** The structure of the M2TM tetramer solved here using lipidic cubic phase methods is completely surrounded with monoolein molecules (orange) (see top image) at its N-terminus and shows few protein-protein contacts within the crystal lattice (see bottom image). The few protein-protein interactions that are observed take place at the C-terminus of the protein.

| <b>Data processing</b> | <b>cryo pH 8.0<br/>(4QK7)</b> | <b>cryo pH 5.5<br/>(4QKC)</b> | <b>RT pH 8.0<br/>(4QKL)</b>     | <b>RT pH 5.5<br/>(4QKM)</b>   |
|------------------------|-------------------------------|-------------------------------|---------------------------------|-------------------------------|
| Resolution range (Å)   | 13.05 - 1.1<br>(1.12 - 1.1)   | 13.06 - 1.1<br>(1.11 - 1.1)   | 20.93 - 1.711<br>(1.77 - 1.711) | 18 - 1.44<br>(1.491 - 1.44)   |
| Space group            | I <sub>4</sub>                | I <sub>4</sub>                | I <sub>4</sub>                  | I <sub>4</sub>                |
| Unit cell              | 29.54 29.54 66.85<br>90 90 90 | 29.31 29.3 67.31<br>90 90 90  | 29.6 29.6 68.14<br>90 90 90     | 30.09 30.09 67.39<br>90 90 90 |
| Total reflections      | 81496(3943)                   | 77823(3516)                   | 5854 (622)                      | 9117 (920)                    |
| Unique reflections     | 11581(575)                    | 11596 (561)                   | 3126 (318)                      | 5252 (523)                    |
| Multiplicity           | 7.0(6.9)                      | 6.7(6.3)                      | 1.9 (2.0)                       | 1.7 (1.8)                     |
| Completeness (%)       | 99.60 (100.00)                | 99.5 (66.1)                   | 97.44 (100.00)                  | 96.38 (97.39)                 |
| Mean I/sigma(I)        | 13.37 (2.8)                   | 17.3 (3.0)                    | 3.64 (1.65)                     | 11.45 (1.61)                  |
| Wilson B-factor        | 9.19                          | 9.19                          | 18.65                           | 15                            |
| R-merge                | 0.072(0.863)                  | 0.050(0.544)                  | 0.1082 (0.3675)                 | 0.03625 (0.4499)              |
| R-meas                 | 0.078(0.935)                  | 0.054(0.593)                  | 0.153                           | 0.05127                       |
| CC1/2                  | 0.999(0.919)                  | 0.999(0.934)                  | 0.97 (0.741)                    | 0.999 (0.798)                 |
| CC*                    |                               |                               | 0.992 (0.922)                   | 1 (0.942)                     |

| <b>Refinement</b>            | <b>cryo pH 8.0<br/>(4QK7)</b> | <b>cryo pH 5.5<br/>(4QKC)</b> | <b>RT pH 8.0<br/>(4QKL)</b>     | <b>RT pH 5.5<br/>(4QKM)</b> |
|------------------------------|-------------------------------|-------------------------------|---------------------------------|-----------------------------|
| Resolution range (Å)         | 13.05 - 1.1<br>(1.139 - 1.1)  | 13.06 - 1.1<br>(1.139 - 1.1)  | 20.93 - 1.711<br>(1.77 - 1.711) | 18 - 1.44 (1.491<br>- 1.44) |
| R-work                       | 0.1070 (0.1879)               | 0.1067 (0.1551)               | 0.1658 (0.2374)                 | 0.1350 (0.1993)             |
| R-free                       | 0.1263 (0.1859)               | 0.1235 (0.1981)               | 0.1976 (0.2845)                 | 0.1715 (0.2876)             |
| Number of non-hydrogen atoms | 454                           | 458                           | 282                             | 323                         |
| macromolecules               | 356                           | 349                           | 244                             | 268                         |
| ligands                      | 62                            | 62                            | 11                              | 36                          |
| water                        | 32                            | 42                            | 26                              | 18                          |
| Protein residues             | 27                            | 27                            | 27                              | 27                          |
| RMS(bonds)                   | 0.015                         | 0.014                         | 0.004                           | 0.016                       |
| RMS(angles)                  | 2.27                          | 1.87                          | 0.62                            | 1.6                         |
| Ramachandran favored (%)     | 100                           | 100                           | 100                             | 100                         |
| Clashscore                   | 14.1                          | 9.9                           | 0                               | 0                           |
| Average B-factor             | 21.3                          | 20.7                          | 23                              | 28.1                        |
| macromolecules               | 14.6                          | 12.5                          | 21                              | 19.6                        |
| ligands                      | 47.7                          | 48.9                          | 29.4                            | 80                          |
| solvent                      | 42.1                          | 44.3                          | 38.2                            | 50.6                        |

**Table S1. Crystallographic data tables.** Data processing and refinement statistics for all of the M2TM structures in the main text.



## Cryogenic density vs. room temp density at each pH

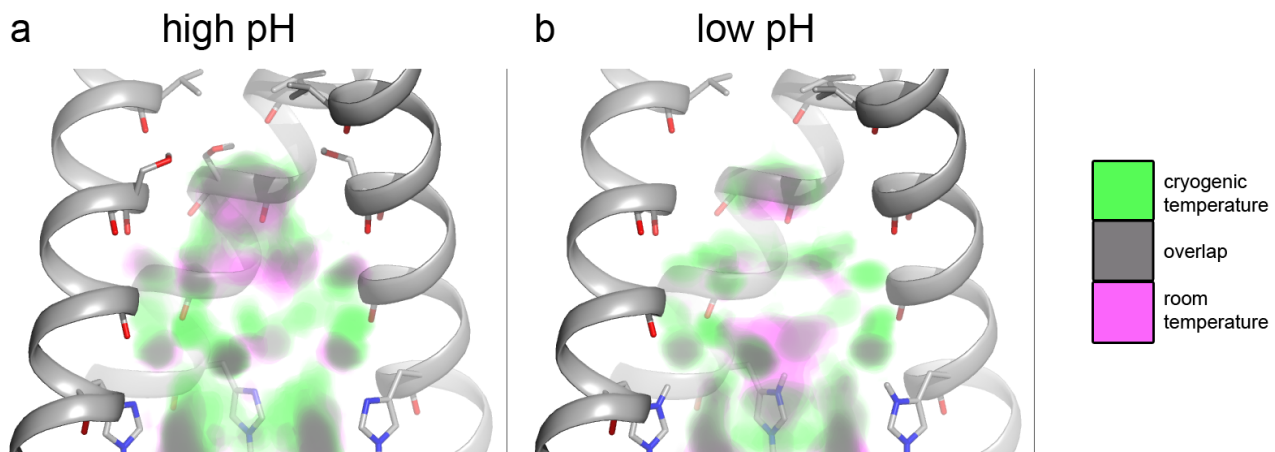

## Molecular dynamics density vs. room temp density at each pH

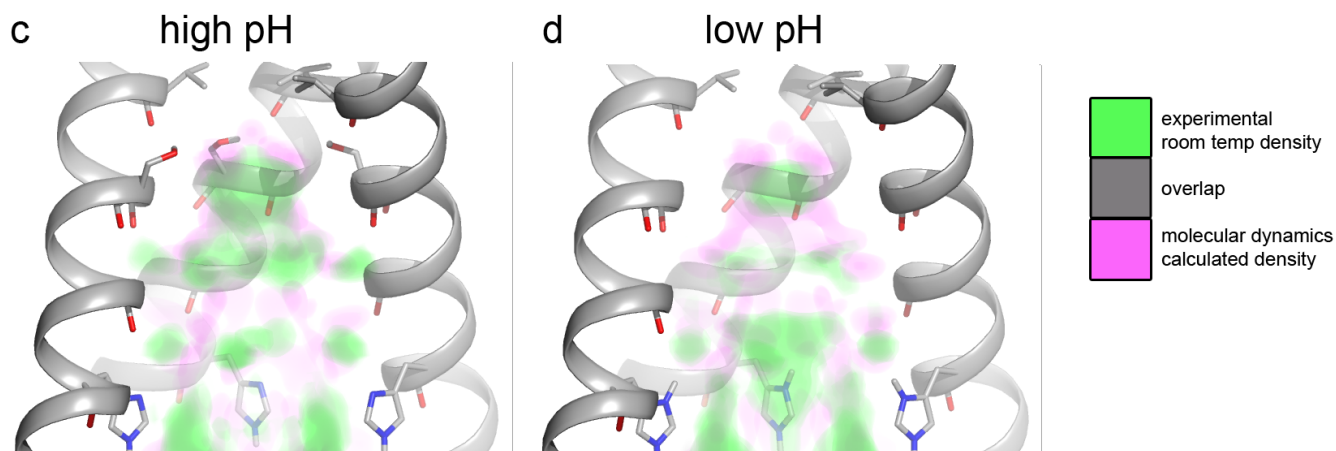

**Figure S2. Further comparisons between density maps.** *Top, a-b:* Comparison of experimentally observed density for the cryogenic and room temperature experimental conditions at high and low pH. *Bottom, c-d:* comparison between calculated electron density from molecular dynamics simulations and experimental density from room temperature conditions at high and low pH. The overlap between densities, shown in gray, is largest in all conditions where the waters bind to the carbonyls of the channel and also where they bind to His37.

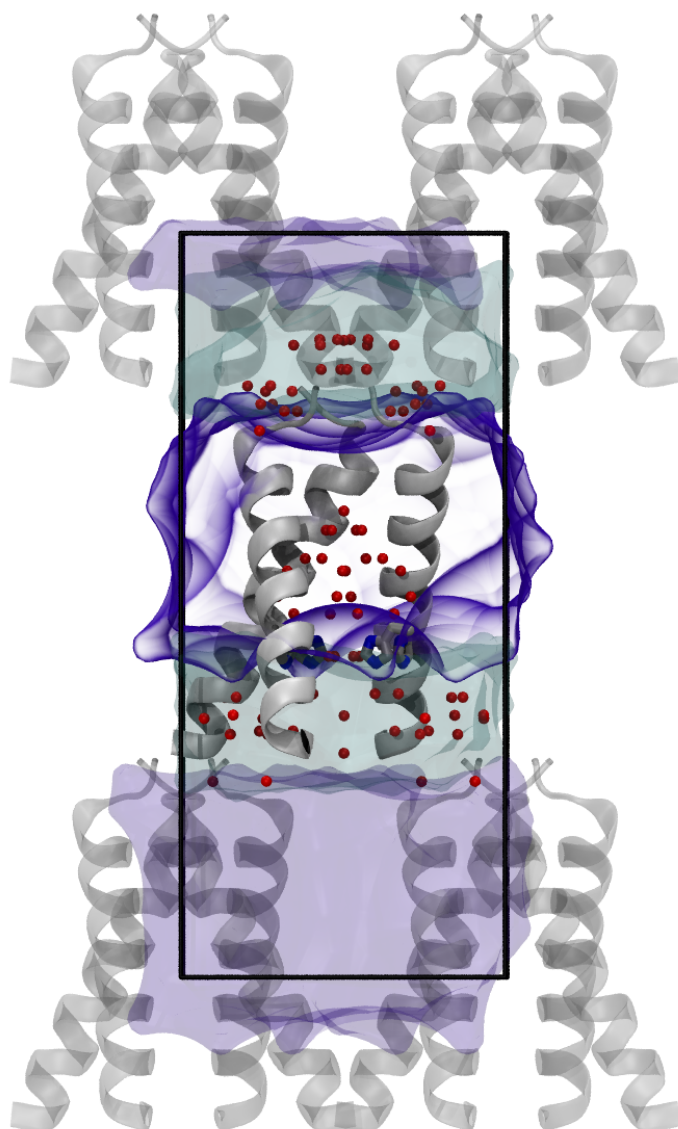

**Figure S3. System setup used in the molecular dynamics simulations.** The central tetramer is displayed as a grey cartoon, removing one of the helices of the tetramer in order to show the crystallographic water molecules and the His37 tetrad. The rest of the water is shown in cyan and the lipidic phase in purple. The simulation box is indicated with black lines, and contains an additional staggered tetramer in order to model the  $I_4$  crystallographic symmetry.

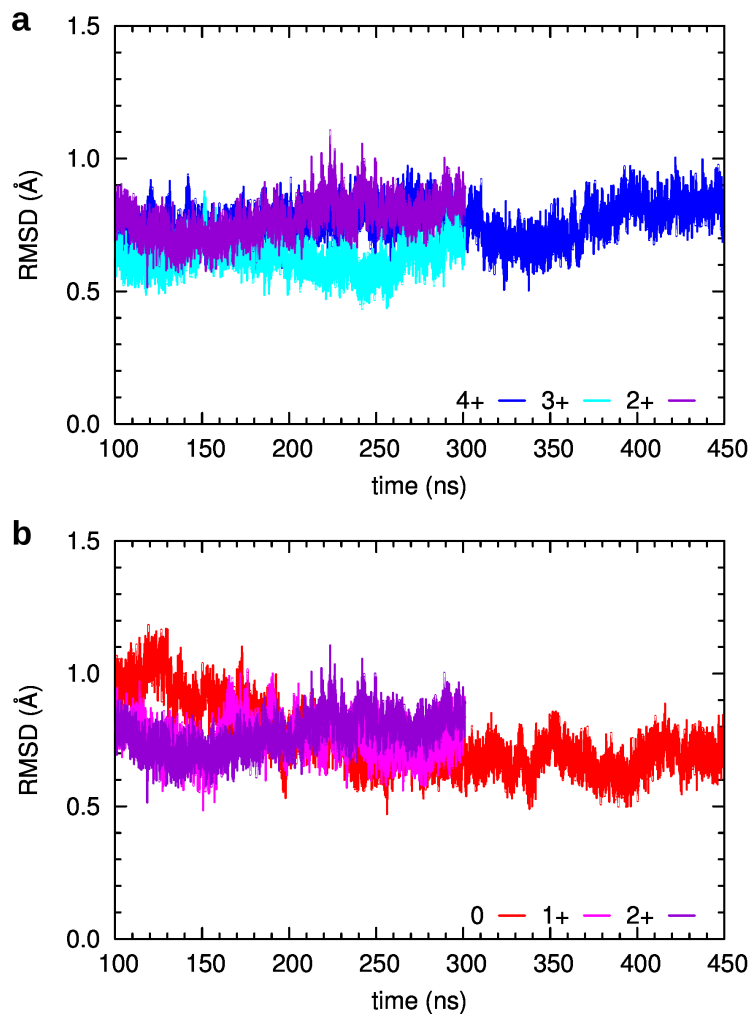

**Figure S4. Evolution of the root mean square deviation (RMSD) of the  $C\alpha$  atoms of M2TM along the MD simulations.** RMSD is calculated with respect to the cryogenic crystal structures. **a**, RMSD for the 4+ (blue), 3+ (cyan) and 2+ (purple) states with respect to the low pH structure (PDB entry 4QKC). **b**, RMSD for neutral (red), 1+ (magenta) and 2+ (purple) states with respect to the high pH structure (PDB entry 4QK7).

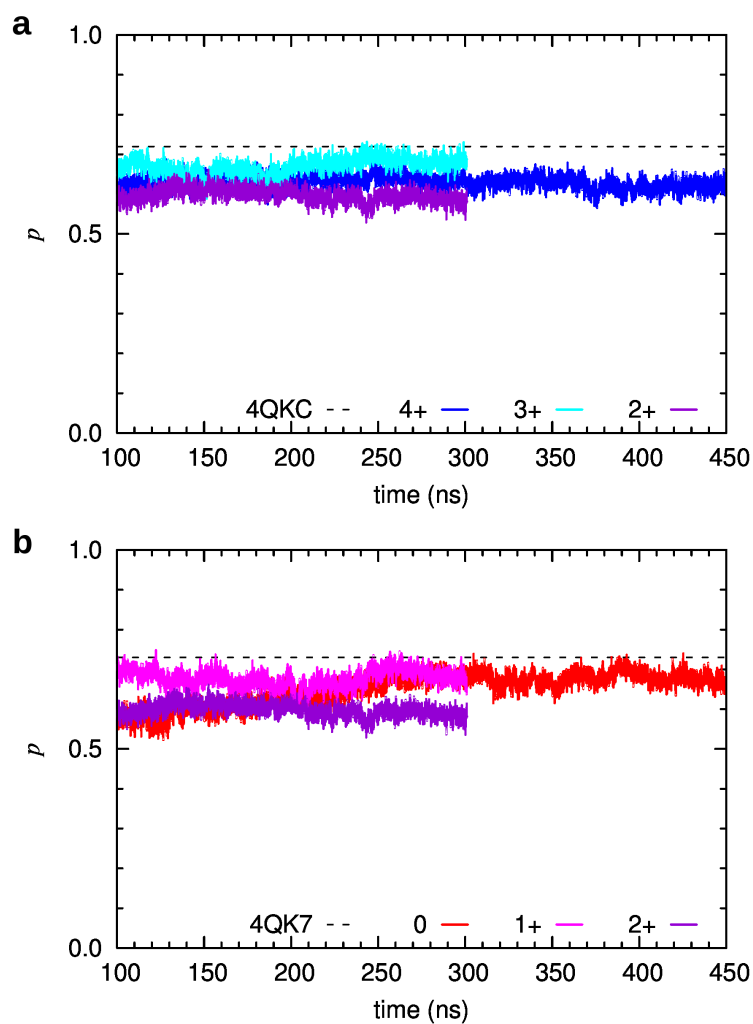

**Figure S5. Evolution of the principal component,  $p$ , along the MD simulations.**  $p$  describes the fraction of C-terminally closed *versus* dilated protein conformation. **a**, Principal component for the 4+ (blue), 3+ (cyan) and 2+ (purple) states; the principal component of the cryogenic crystal structure at low pH (PDB entry 4QKC) is shown as a black dashed line. **b**, Principal component for the neutral (red), 1+ (magenta) and 2+ (purple) states; the principal component of the cryogenic crystal structure at high pH (PDB entry 4QK7) is shown as a black dashed line.

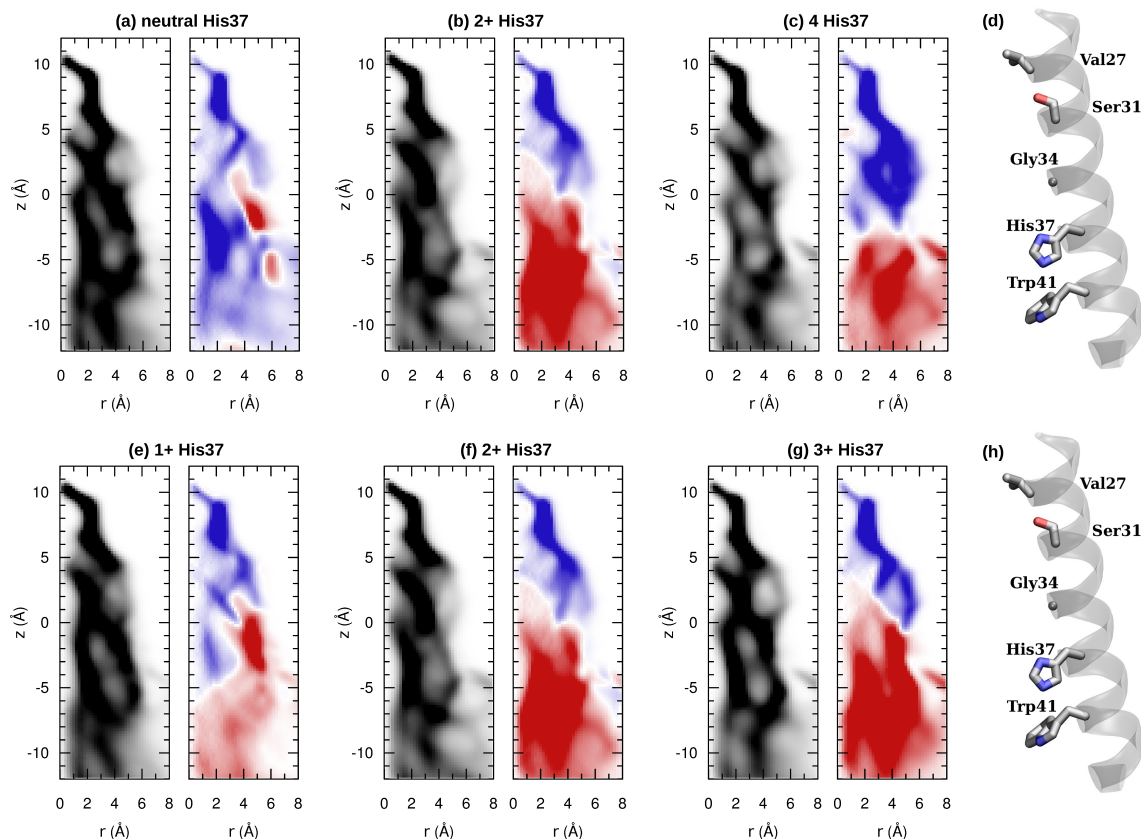

**Figure S6. Two-dimensional profile of the hydrogen bond vectors at different charge states of the His37 tetrad.** Shown are the density (black,  $\text{\AA}^{-3}$  units) and average orientation (red and blue,  $\text{\AA}^{-2}$  units) of hydrogen bond vectors as a function of the distance from the pore axis,  $r$ , and the displacement along the axis,  $z$ . Blue areas indicate regions populated by outward-oriented H-bonds, red denote inward-oriented H-bonds. *Top: a-c*, Density and average orientation of hydrogen bond vectors for a neutral channel, at the 2+ charge state and at the 4+ charge state, respectively. *d*, M2TM monomer, indicating the position of the pore-lining residues (Val27, Ser31, His37 and Trp41). *Bottom: e-g*, Density and average orientation of hydrogen bond vectors at the 1+, 2+ and the 3+ charge states, respectively; the 2+ charge state is the same as in (b). *h*, M2TM monomer, indicating the position of the pore-lining residues (Val27, Ser31, His37 and Trp41).



**Table S2. Average number of hydrogen bonds in the M2 pore at different charge states of the His37 tetrad.** The hydrogen bonds are classified as extraviral or intraviral depending on their position (either above or below) with respect to the His37 tetrad. The total number of hydrogen bonds is decomposed in outwards (in blue) or inwards (in red) depending on the hydrogen bond orientation (either towards the viral exterior or interior, respectively).

|                                     |          | <b>neutral His37</b> | <b>2+ His37</b> | <b>4+ His37</b> |
|-------------------------------------|----------|----------------------|-----------------|-----------------|
| <b>extraviral<br/>(above His37)</b> | total    | 41.8 ± 4.8           | 37.7 ± 4.3      | 33.3 ± 4.2      |
|                                     | outwards | 22.4 ± 3.7           | 22.1 ± 3.6      | 20.7 ± 4.0      |
|                                     | inwards  | 19.5 ± 3.6           | 15.6 ± 3.4      | 12.6 ± 3.8      |
| <b>intraviral<br/>(below His37)</b> | total    | 53.8 ± 6.2           | 38.0 ± 5.8      | 46.3 ± 6.2      |
|                                     | outwards | 29.8 ± 5.0           | 13.8 ± 3.9      | 16.9 ± 4.9      |
|                                     | inwards  | 24.0 ± 4.7           | 24.2 ± 4.9      | 29.4 ± 5.6      |
|                                     |          | <b>1+ His37</b>      | <b>2+ His37</b> | <b>3+ His37</b> |
| <b>extraviral<br/>(above His37)</b> | total    | 41.2 ± 4.7           | 37.7 ± 4.3      | 40.5 ± 4.4      |
|                                     | outwards | 20.5 ± 3.6           | 22.1 ± 3.6      | 20.1 ± 3.5      |
|                                     | inwards  | 20.8 ± 3.6           | 15.6 ± 3.4      | 20.4 ± 3.5      |
| <b>intraviral<br/>(below His37)</b> | total    | 49.7 ± 5.8           | 38.0 ± 5.8      | 48.9 ± 6.6      |
|                                     | outwards | 22.5 ± 4.3           | 13.8 ± 3.9      | 13.4 ± 4.0      |
|                                     | inwards  | 27.2 ± 4.9           | 24.2 ± 4.9      | 35.5 ± 5.8      |

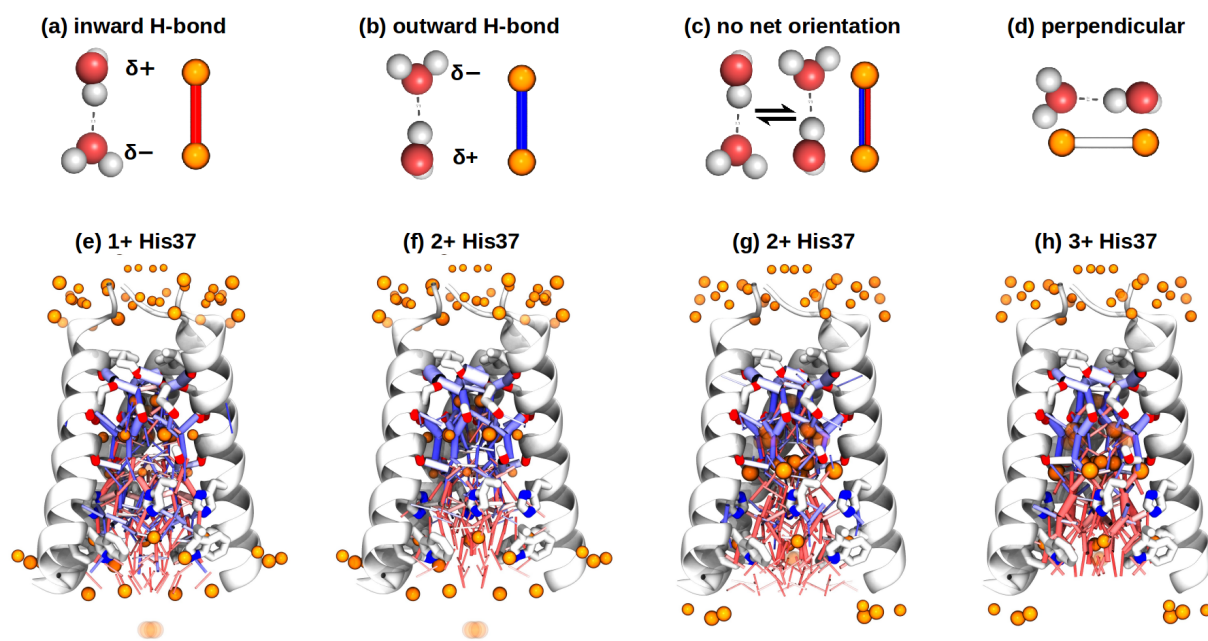

**Figure S7. Water wires calculated from the molecular dynamics simulations at different charge states of the His37 tetrad.** *Top*, Schematic representation of the four possible hydrogen bond patterns between water molecules inside the M2 pore. **a-b**, Directional hydrogen bonds oriented towards either the viral interior (a) or the channel exterior (b), respectively. **c**, Hydrogen bond without a preferred directionality (*i.e.* flips back and forth between the two orientations). **d**, Hydrogen bond perpendicular to the pore axis. For each possible hydrogen bond pattern, the atomistic representation of the corresponding water dimer is shown on the left and the water wire counterpart on the right, with the water oxygen atoms as orange spheres and the hydrogen bonds as sticks; the color scale denotes the hydrogen bond orientation, either inwards (in red), outwards (in blue) or perpendicular to the pore axis (in white). *Bottom*, Water wires calculated from the MD simulations. The oxygen atoms of the water molecules observed in the room temperature X-ray structures are shown as van der Waals spheres (orange color), with the diameter proportional to the crystallographic B-factors and transparency reflecting partial occupancy. Hydrogen bonds are represented as sticks, with a color scale denoting their orientation (see panels a-d), and thickness proportional to their population. **e-f**, Water wires for the 1+ and 2+ charge states, respectively, for the production simulations starting from the cryogenic high pH crystal structure (PDB entry 4QK7). **g-h**, Water wires at the 2+ and 3+ charge states, respectively, for the production simulations starting from the cryogenic low pH crystal structure (PDB entry 4QKC).

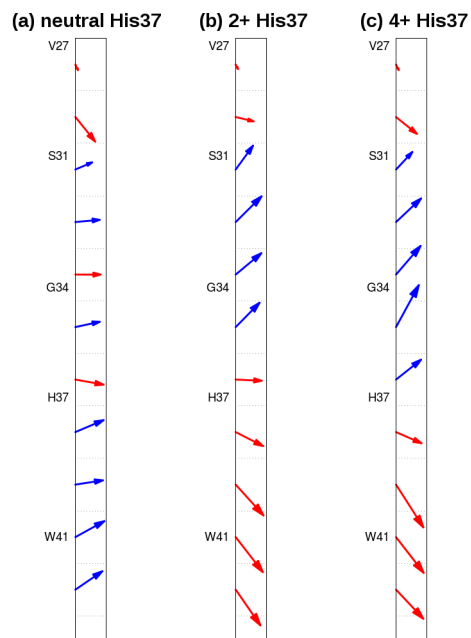

**Figure S8. Average hydrogen bond vectors along the M2 pore at different charge states of the His37 tetrad.** The vector direction reflects the net orientation with respect to the pore axis, with the H-bonds pointing to the exterior of the channel (outwards) colored in blue and the ones pointing to the viral interior (inwards) in red. The vector length is proportional to the magnitude of the net hydrogen bond (i.e. the longer, the larger the preference to be oriented in that direction). The hydrogen bonds are averaged over 2 Å bins along the pore axis (delimited by dashed black lines). **a-c**, Average hydrogen bond vectors for a neutral channel, at the 2+ charge state and at the 4+ charge state, respectively. **d-f**, Average hydrogen bond vectors at the 1+, 2+ and 3+ charge states, respectively.

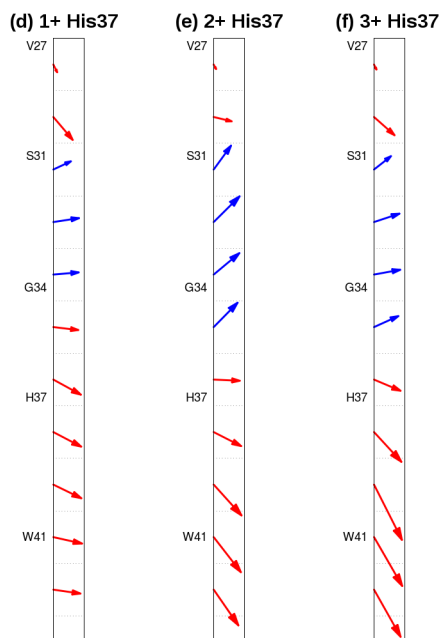

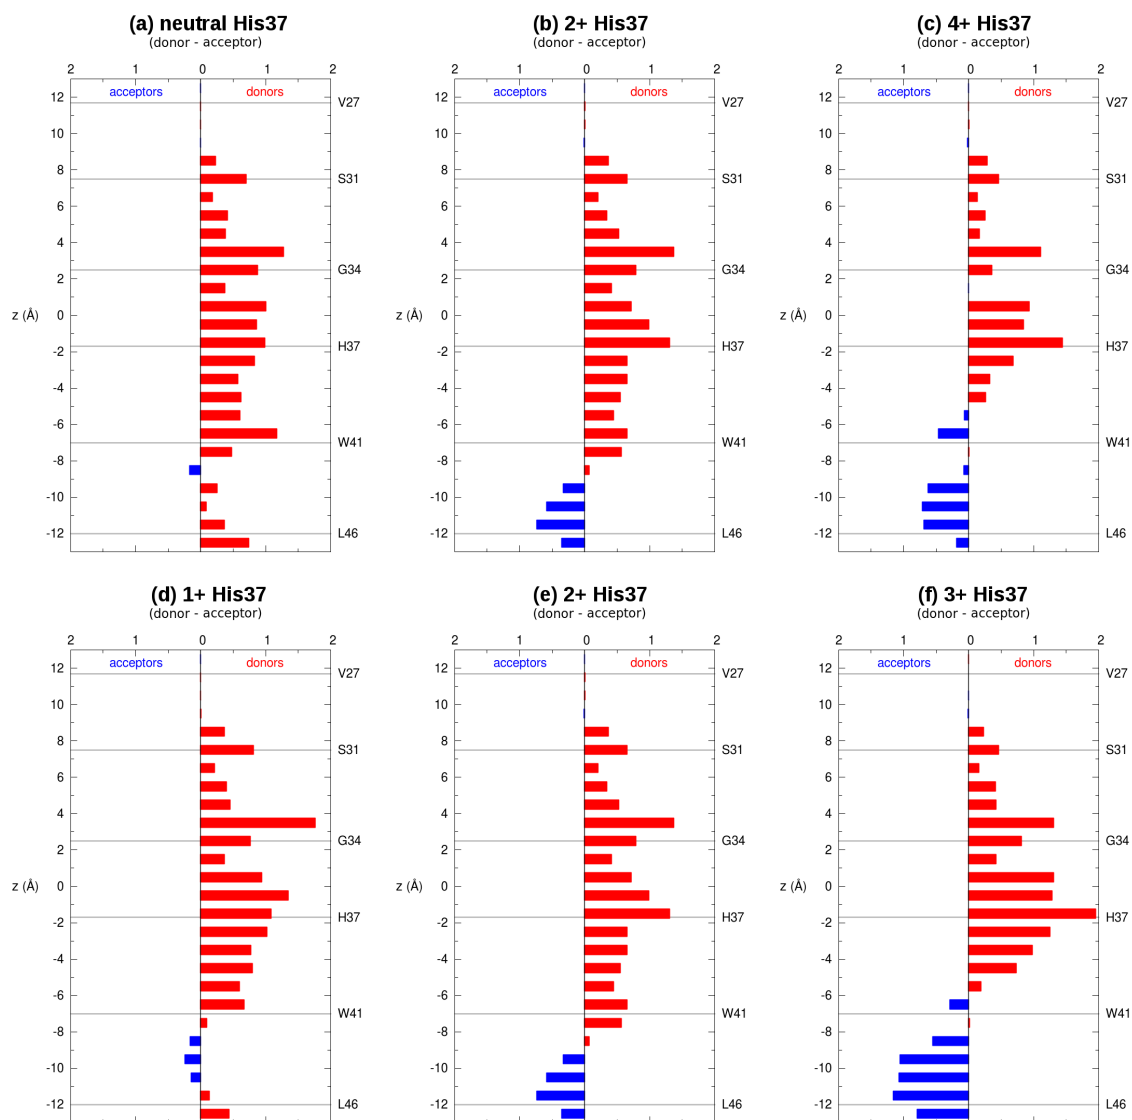

**Figure S9. Difference between the number of water molecules acting as hydrogen bond donors and acceptors at different charge states of the His37 tetrad.** The (*donor-acceptor*) difference along the M2 pore axis ( $z$ , in Å) is shown. Red bars represent a net number of donors at that pore position and blue bars a net number of acceptors. The position of the pore-lining M2 residues (C<sub>α</sub> atom of Val27, Ser31, Gly34, His37, Trp41 and Leu46) is indicated by horizontal grey lines. **a-c**, Difference (*donor-acceptor*) for a neutral channel, at the 2+ charge state and at the 4+ charge state, respectively. **d-f**, Difference (*donor-acceptor*) at the 1+, 2+ and 3+ charge states; the 2+ state is the same as in **b**.

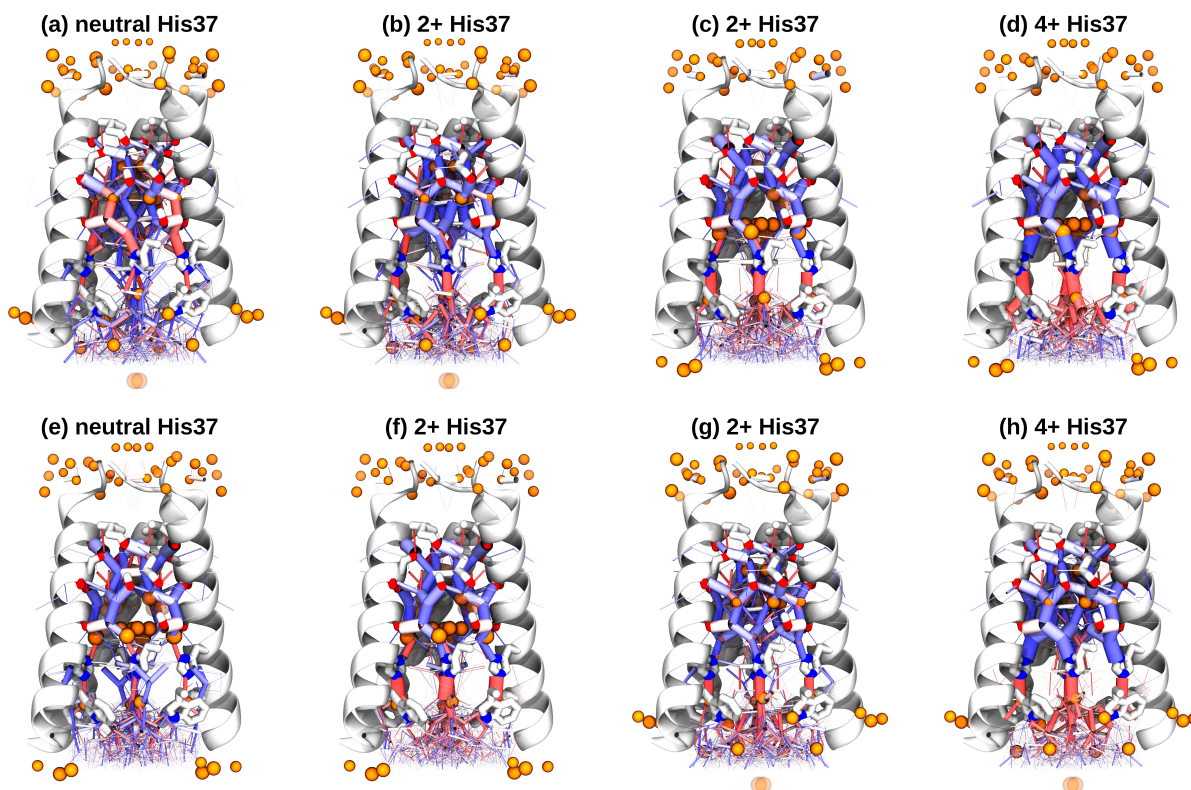

**Figure S10. Water wires calculated from the control simulations at different charge states of the His37 tetrad.** The oxygen atoms of the water molecules observed in the room temperature X-ray structures are shown as van der Waals spheres (orange color), with the diameter proportional to the crystallographic B-factors and transparency reflecting partial occupancy. Hydrogen bonds are represented as sticks, with a color scale denoting their orientation (see Supplementary Figure S7), and thickness proportional to their population. *Top*, Restrained MD simulations. **a-b**, Water wires for the neutral charge state and at the 2+ charge state, respectively, for the restrained simulations starting from the high pH crystal structure (PDB entry 4QK7). **c-d**, Water wires at the 2+ and 4+ charge states, respectively, for the restrained simulations starting from the low pH crystal structure (PDB entry 4QKC). *Bottom*, Swapped MD simulations. **e-h**, Water wires calculated from the swapped control simulations at different charge states of the His37 tetrad. **e-f**, Water wires for the neutral charge state and at the 2+ charge state, respectively, for the swapped simulations with the high pH protein structure and low pH water sites. **g-h**, Water wires at the 2+ and 4+ charge states, respectively, for the swapped simulations with the low pH protein structure and high pH water sites.



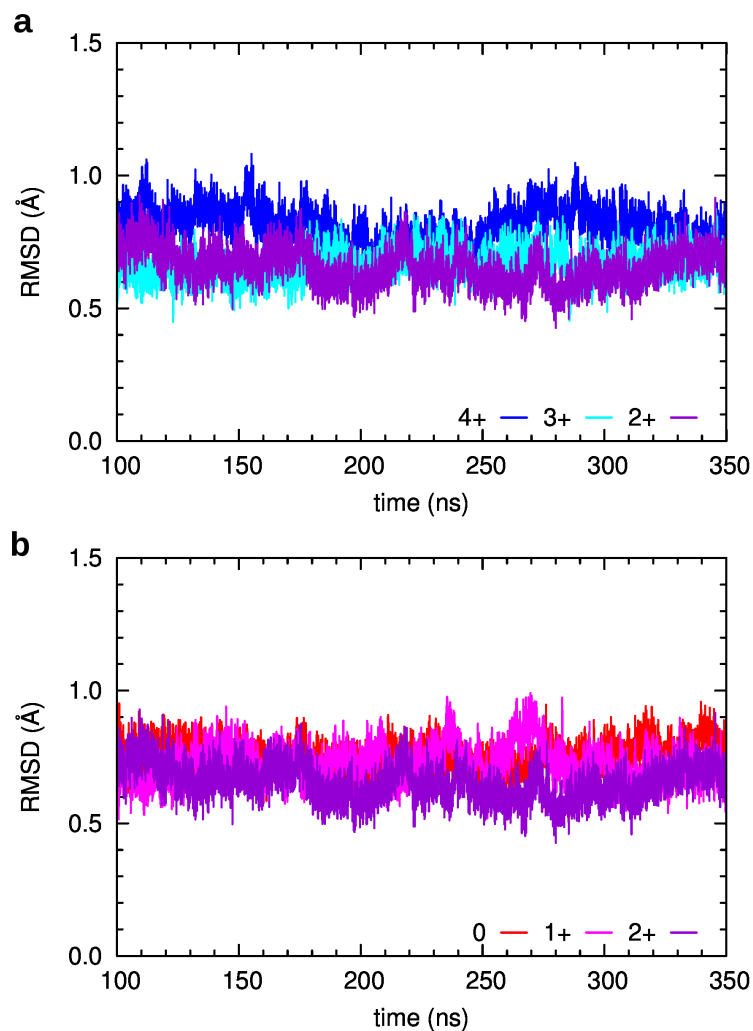

**Figure S11. Evolution of the root mean square deviation (RMSD) of the  $C\alpha$  atoms of M2TM along the MD simulations of the S31N mutant.** RMSD is calculated with respect to the cryogenic crystal structures. **a**, RMSD for the 4+ (blue), 3+ (cyan) and 2+ (purple) states with respect to the low pH structure (PDB entry 4QKC). **b**, RMSD for neutral (red), 1+ (magenta) and 2+ (purple) states with respect to the high pH structure (PDB entry 4QK7).

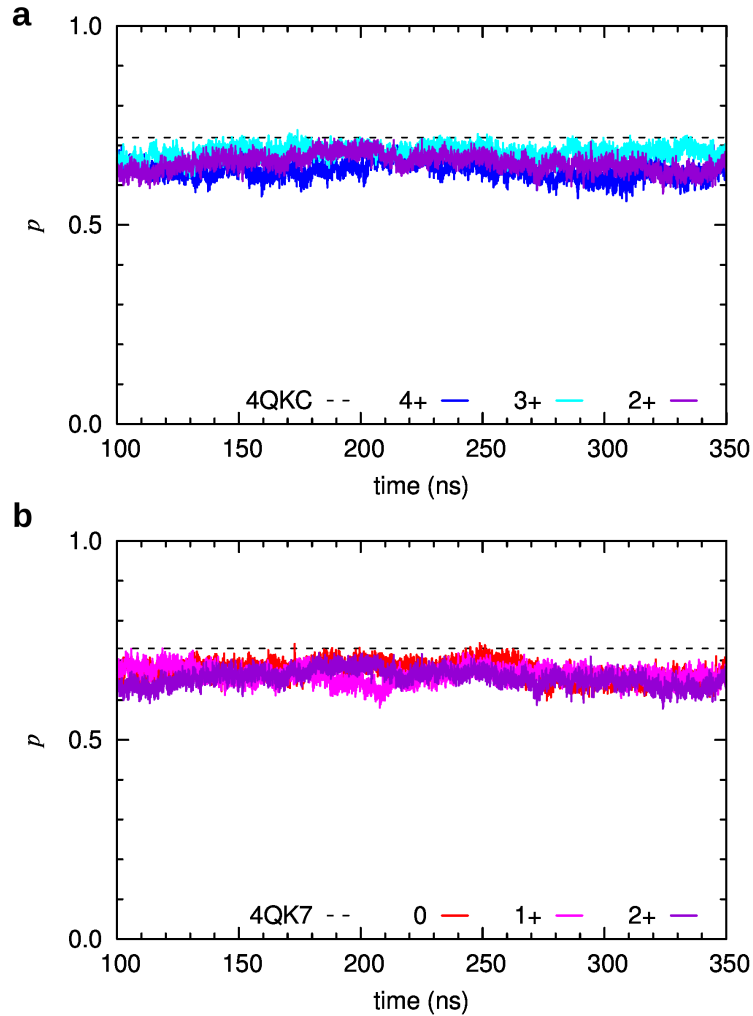

**Figure S12. Evolution of the principal component,  $p$ , along the MD simulations of the S31N M2TM mutant.**  $p$  describes the fraction of C-terminally closed *versus* dilated protein conformation. **a**, Principal component for the 4+ (blue), 3+ (cyan) and 2+ (purple) states; the principal component of the cryogenic crystal structure at low pH (PDB entry 4QKC) is shown as a black dashed line. **b**, Principal component for the neutral (red), 1+ (magenta) and 2+ (purple) states; the principal component of the cryogenic crystal structure at high pH (PDB entry 4QK7) is shown as a black dashed line.

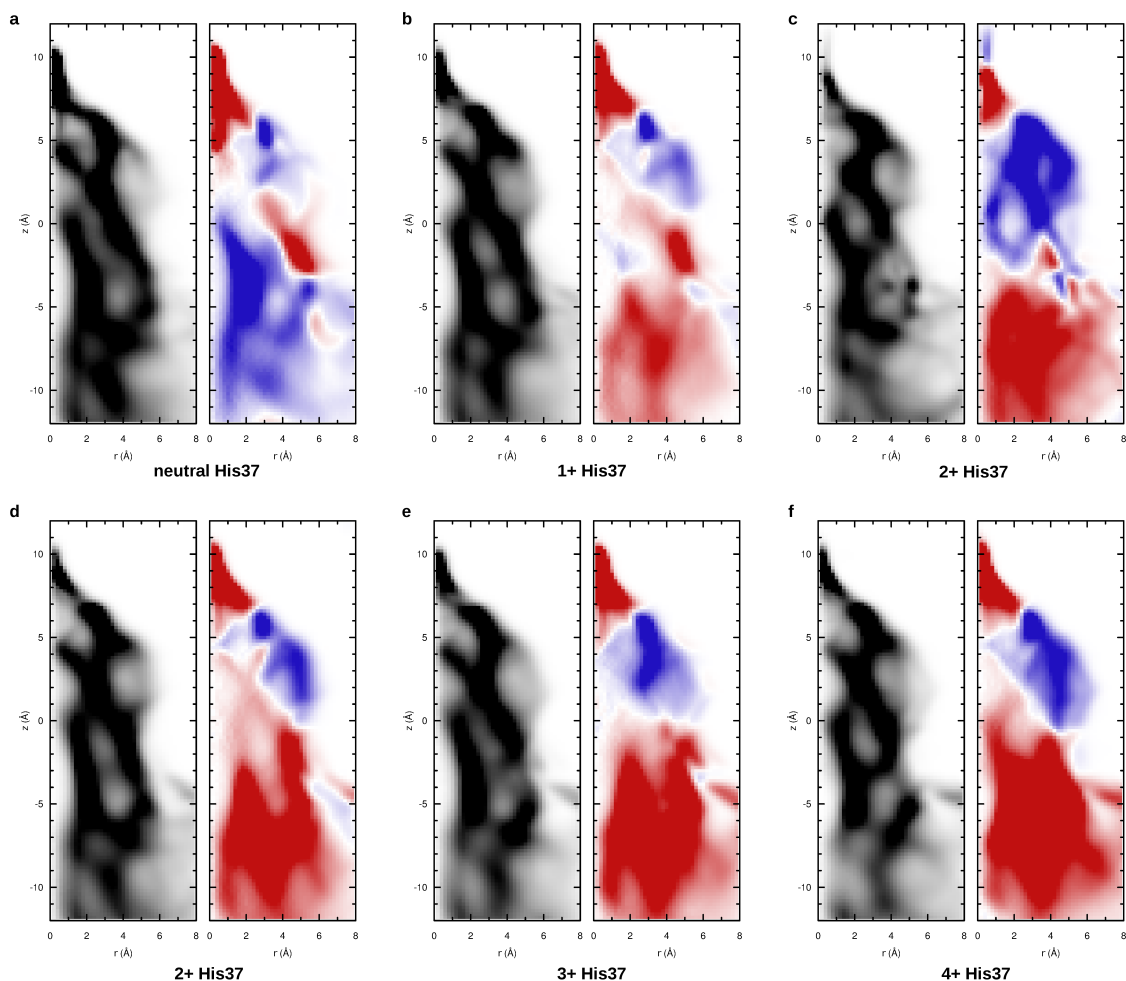

**Figure S13. Two-dimensional profile of the hydrogen bond vectors at different charge states of the His37 tetrad for the S31N mutant.** Shown are the density (black,  $\text{\AA}^{-3}$  units) and average orientation (red and blue,  $\text{\AA}^{-2}$  units) of hydrogen bond vectors as a function of the distance from the pore axis,  $r$ , and the displacement along the axis,  $z$ . Blue areas indicate regions populated by outward-oriented H-bonds, red denote inward-oriented H-bonds. *Top: a-c*, Density and average orientation of hydrogen bond vectors at the 0, 1+, 2+ charge states, respectively, started from the high pH cryo structure. *Bottom: d-f*, Density and average orientation of hydrogen bond vectors for at the 2+, 3+ and 4+ charge states, respectively, started from the low pH cryo structure.

**Table S3. Average number of hydrogen bonds in the M2 pore at different charge states of the His37 tetrad for the S31N M2 mutant.** The hydrogen bonds are classified as extraviral or intraviral depending on their position (either above or below) with respect to the His37 tetrad. The total number of hydrogen bonds is decomposed in outwards (in blue) or inwards (in red) depending on the hydrogen bond orientation (either towards the viral exterior or interior, respectively). The 4QK7-based simulations were started from the low pH cryogenic X-ray structure and the 4QKC-based from the high pH cryogenic X-ray structure.

| <b>4QK7-based simulations</b>       |          | <b>neutral His37</b> | <b>1+ His37</b> | <b>2+ His37</b> |
|-------------------------------------|----------|----------------------|-----------------|-----------------|
| <b>extraviral<br/>(above His37)</b> | total    | 38.1 ± 4.8           | 39.9 ± 5.0      | 31.1 ± 4.1      |
|                                     | outwards | 18.9 ± 3.6           | 18.9 ± 3.5      | 18.4 ± 3.3      |
|                                     | inwards  | 19.4 ± 3.5           | 21.0 ± 3.9      | 12.7 ± 3.0      |
| <b>intraviral<br/>(below His37)</b> | total    | 52.5 ± 6.2           | 52.0 ± 6.5      | 46.5 ± 5.9      |
|                                     | outwards | 30.1 ± 5.1           | 22.8 ± 4.7      | 17.9 ± 4.2      |
|                                     | inwards  | 22.4 ± 4.5           | 29.2 ± 5.3      | 28.6 ± 5.1      |
| <b>4QKC-based simulations</b>       |          | <b>2+ His37</b>      | <b>3+ His37</b> | <b>4+ His37</b> |
| <b>extraviral<br/>(above His37)</b> | total    | 39.5 ± 4.5           | 38.3 ± 4.4      | 35.7 ± 4.2      |
|                                     | outwards | 18.8 ± 3.4           | 18.1 ± 3.3      | 17.3 ± 3.1      |
|                                     | inwards  | 20.7 ± 3.5           | 20.2 ± 3.5      | 18.4 ± 3.4      |
| <b>intraviral<br/>(below His37)</b> | total    | 53.2 ± 6.6           | 48.6 ± 5.6      | 45.7 ± 5.7      |
|                                     | outwards | 18.9 ± 4.4           | 14.1 ± 3.8      | 10.1 ± 3.4      |
|                                     | inwards  | 34.2 ± 5.6           | 34.5 ± 5.3      | 35.6 ± 5.4      |

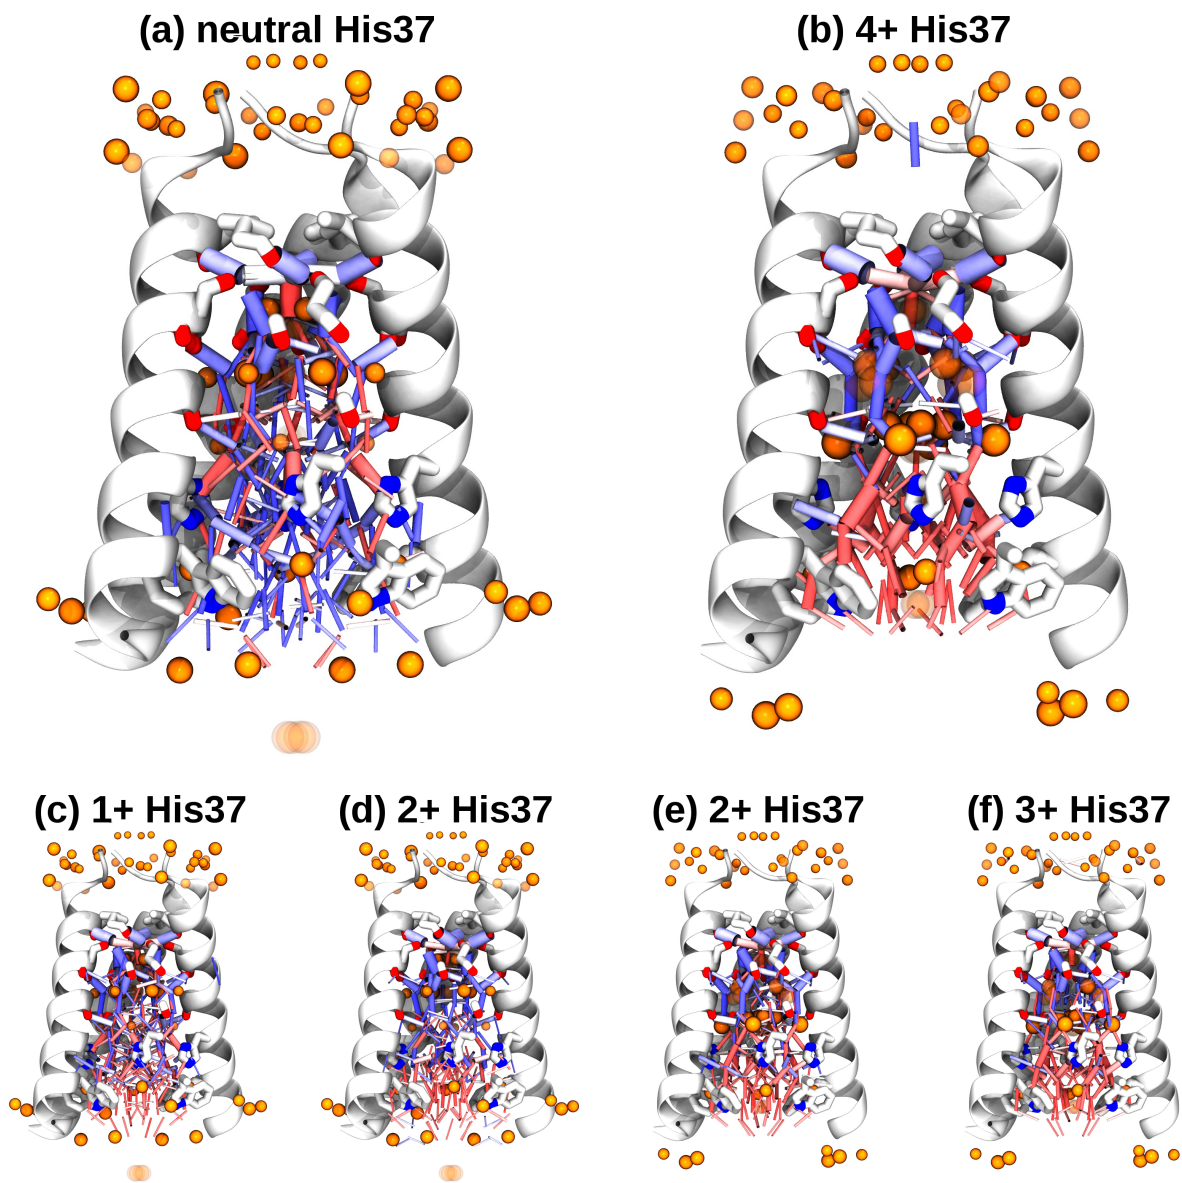

**Figure S14. Water wires calculated from the molecular dynamics simulations at different charge states of the His37 tetrad for the S31N mutant.** The oxygen atoms of the water molecules observed in the room temperature X-ray structures are shown as orange van der Waals spheres (orange color), with the diameter proportional to the crystallographic B-factors and transparency reflecting partial occupancy. Hydrogen bonds are represented as sticks, with a color scale denoting their orientation (see panels a-d), and thickness proportional to their population. **a** and **c-d**, Water wires for the 0, 1+ and 2+ charge states, respectively, for the production simulations starting from the cryogenic high pH crystal structure (PDB entry 4QK7). **b** and **d-e**, Water wires at the 4+, 2+ and 3+ charge states, respectively, for the production simulations starting from the cryogenic low pH crystal structure (PDB entry 4QKC). N.B.: the water wires of the S31N simulation are shown over the room temperature structure of wild-type M2TM, thus the residue displayed at position 31 is a serine instead of the asparagine used in the simulation.



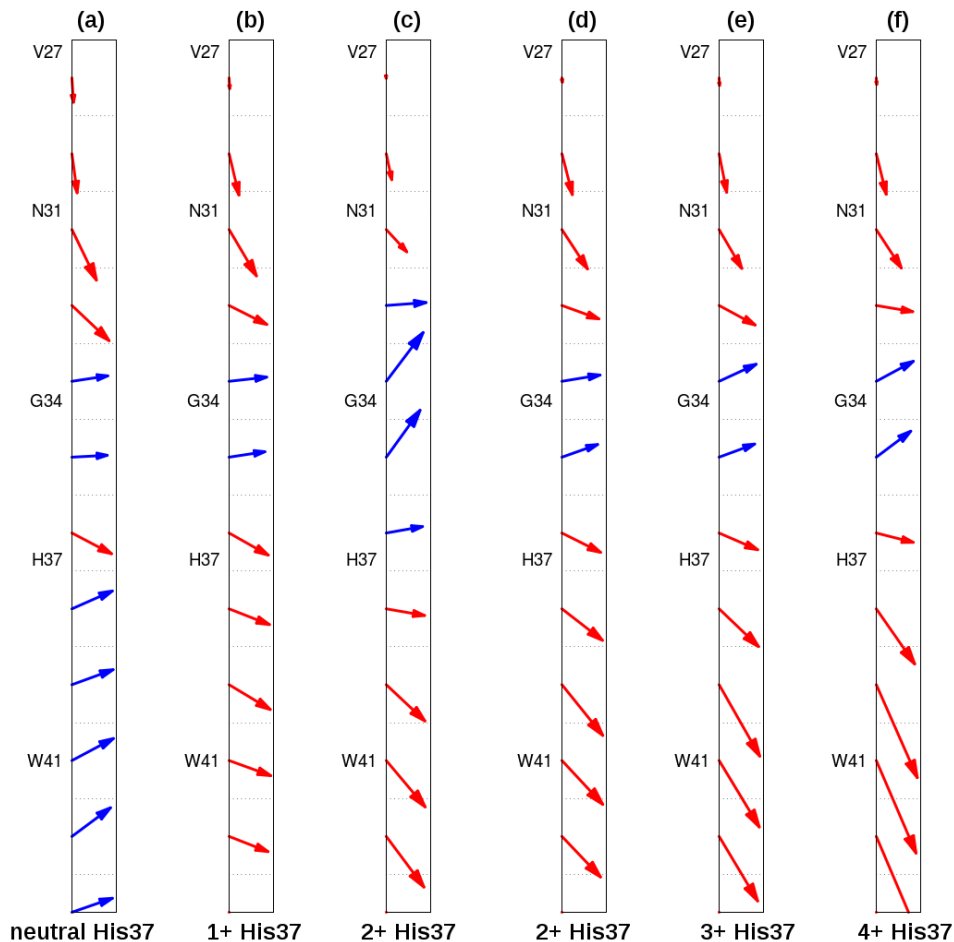

**Figure S15. Average hydrogen bond vectors along the M2 pore at different charge states of the His37 tetrad for the S31N mutant.** The vector direction reflects the net orientation with respect to the pore axis, with the H-bonds pointing to the exterior of the channel (outwards) colored in blue and the ones pointing to the viral interior (inwards) in red. The vector length is proportional to the magnitude of the net hydrogen bond (i.e. the longer, the larger the preference to be oriented in that direction). The hydrogen bonds are averaged over 2 Å bins along the pore axis (delimited by dashed black lines). **a-c**, Average hydrogen bond vectors at the 0, 1+, 2+ charge states, respectively, for the production simulations starting from the high pH cryogenic crystal structure (PDB entry 4QK7). **d-f**, Average hydrogen bond vectors at the 2+, 3+, 4+ charge states, respectively, for the production simulations starting from the low pH cryogenic crystal structure (PDB entry 4QKC).

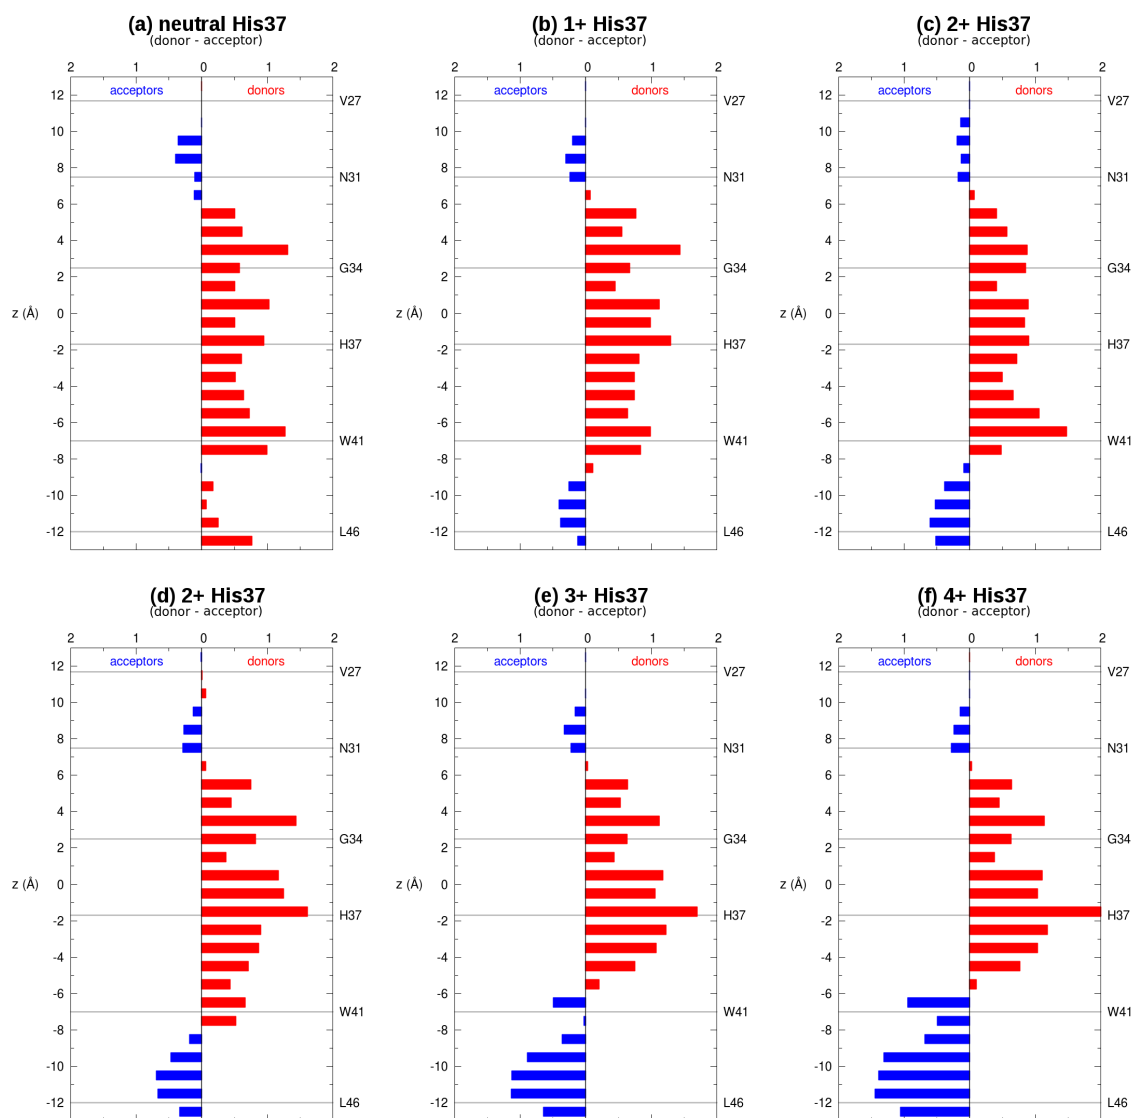

**Figure S16. Difference between the number of water molecules acting as hydrogen bond donors and acceptors at different charge states of the His37 tetrad for the S31N mutant.** The (*donor–acceptor*) difference along the M2 pore axis ( $z$ , in Å) is shown. Red bars represent a net number of donors at that pore position and blue bars a net number of acceptors. The position of the pore-lining M2 residues ( $C_{\alpha}$  atom of Val27, Ser31, Gly34, His37, Trp41 and Leu46) is indicated by horizontal grey lines. *Top: a-c*, Difference (*donor–acceptor*) at the 0, 1+ and 2+ charge states, respectively, for the production simulations starting from the cryogenic high pH crystal structure (PDB entry 4QK7). *d-f*, Difference (*donor–acceptor*) at the 2+, 3+ and 4+ charge states, respectively, for the production simulations starting from the cryogenic low pH crystal structure (PDB entry 4QKC).

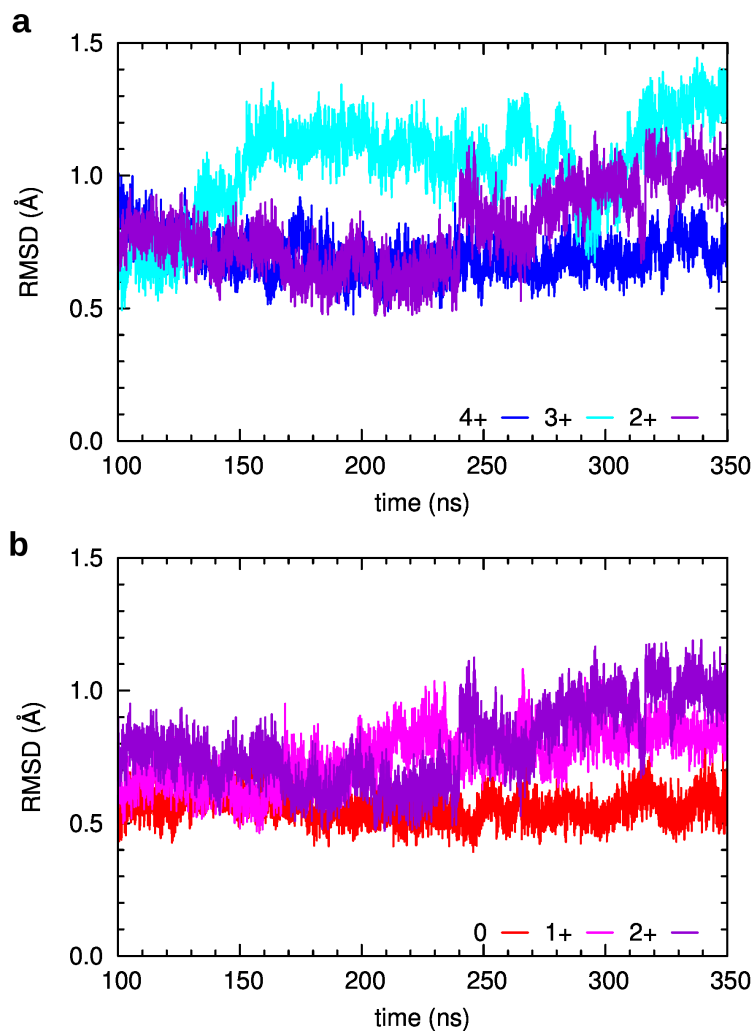

**Figure S17. Evolution of the root mean square deviation (RMSD) of the  $C\alpha$  atoms of M2TM along the MD simulations of the D44N mutant.** RMSD is calculated with respect to the cryogenic crystal structures. **a**, RMSD for the 4+ (blue), 3+ (cyan) and 2+ (purple) states with respect to the low pH structure (PDB entry 4QKC). **b**, RMSD for neutral (red), 1+ (magenta) and 2+ (purple) states with respect to the high pH structure (PDB entry 4QK7).

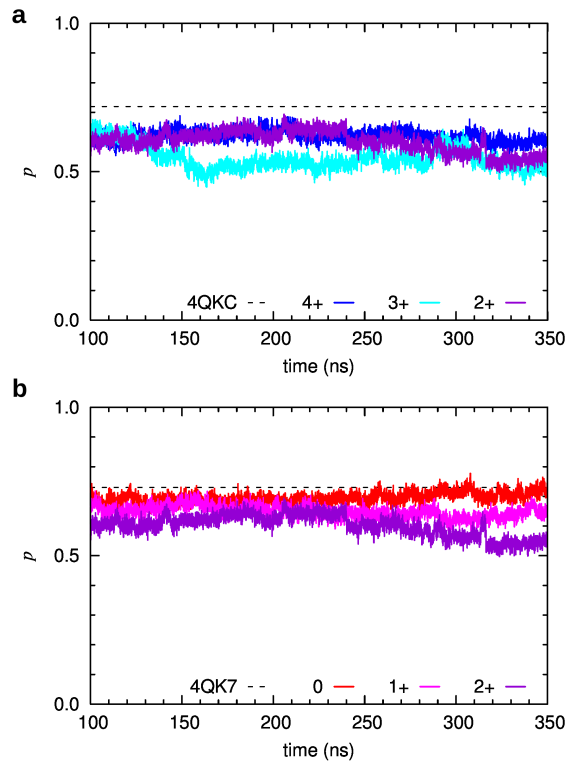

**Figure S18. Evolution of the principal component,  $p$ , along the MD simulations of the D44N M2TM mutant.**  $p$  describes the fraction of C-terminally closed *versus* dilated protein conformation. **a**, Principal component for the 4+ (blue), 3+ (cyan) and 2+ (purple) states; the principal component of the cryogenic crystal structure at low pH (PDB entry 4QKC) is shown as a black dashed line. **b**, Principal component for the neutral (red), 1+ (magenta) and 2+ (purple) states; the principal component of the cryogenic crystal structure at high pH (PDB entry 4QK7) is shown as a black dashed line.

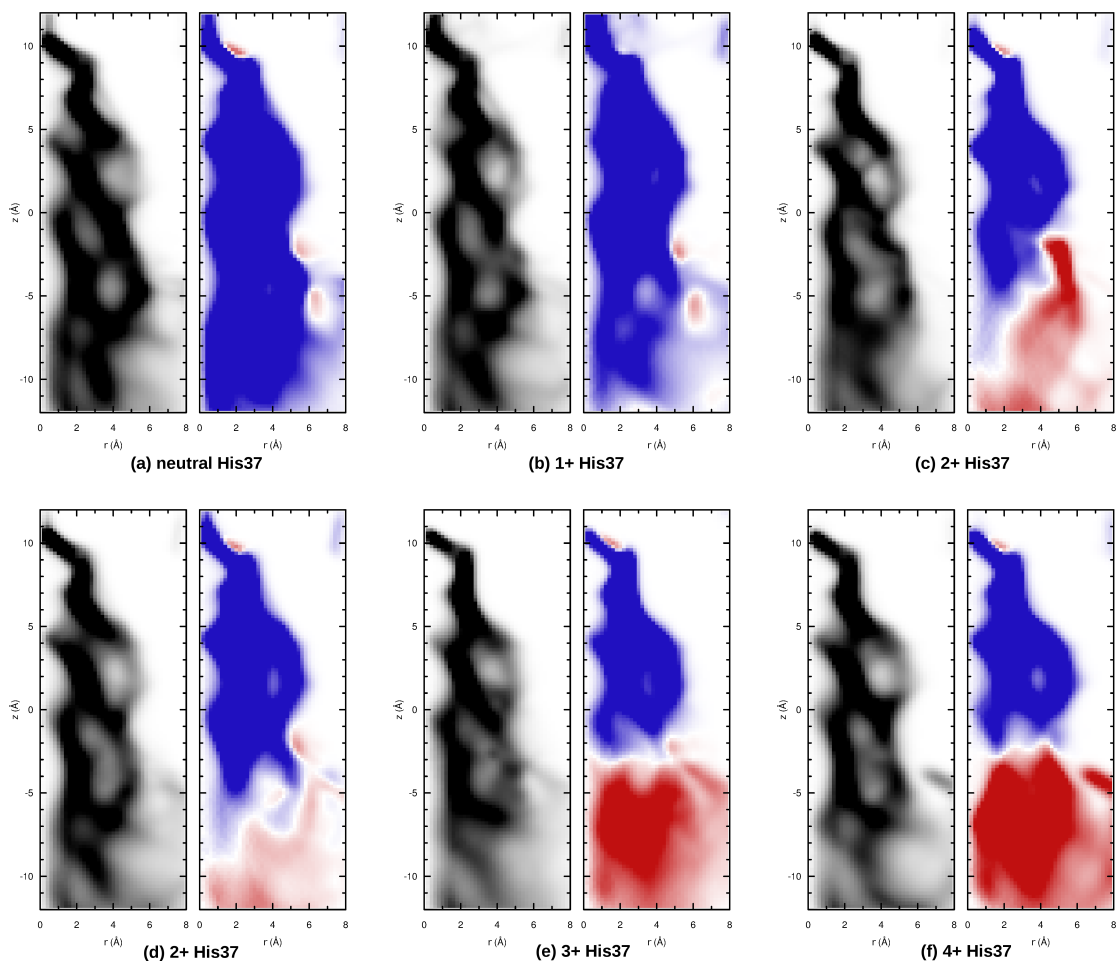

**Figure S19. Two-dimensional profile of the hydrogen bond vectors at different charge states of the His37 tetrad for the D44N mutant.** Shown are the density (black,  $\text{\AA}^{-3}$  units) and average orientation (red and blue,  $\text{\AA}^{-2}$  units) of hydrogen bond vectors as a function of the distance from the pore axis,  $r$ , and the displacement along the axis,  $z$ . Blue areas indicate regions populated by outward-oriented H-bonds, red denote inward-oriented H-bonds. *Top: a-c*, Density and average orientation of hydrogen bond vectors at the 0, 1+, 2+ charge states, respectively, started from the high pH cryo structure. *Bottom: d-f*, Density and average orientation of hydrogen bond vectors for at the 2+, 3+ and 4+ charge states, respectively, started from the low pH cryo structure.



**Table S4. Average number of hydrogen bonds in the M2 pore at different charge states of the His37 tetrad for the D44N M2 mutant.** The hydrogen bonds are classified as extraviral or intraviral depending on their position (either above or below) with respect to the His37 tetrad. The total number of hydrogen bonds is decomposed in outwards (in blue) or inwards (in red) depending on the hydrogen bond orientation (either towards the viral exterior or interior, respectively).

| <b>4QK7-based simulations</b>       |          | <b>neutral His37</b> | <b>1+ His37</b> | <b>2+ His37</b> |
|-------------------------------------|----------|----------------------|-----------------|-----------------|
| <b>extraviral<br/>(above His37)</b> | total    | 45.9 ± 4.9           | 41.6 ± 5.5      | 37.1 ± 4.5      |
|                                     | outwards | 36.5 ± 4.4           | 34.1 ± 4.5      | 27.2 ± 4.0      |
|                                     | inwards  | 9.4 ± 2.8            | 7.6 ± 2.9       | 9.8 ± 2.7       |
| <b>intraviral<br/>(below His37)</b> | total    | 51.9 ± 6.3           | 45.4 ± 6.7      | 42.1 ± 6.4      |
|                                     | outwards | 38.2 ± 5.2           | 27.3 ± 5.2      | 18.4 ± 4.5      |
|                                     | inwards  | 13.7 ± 3.7           | 18.1 ± 4.1      | 23.7 ± 4.5      |

  

| <b>4QKC-based simulations</b>       |          | <b>2+ His37</b> | <b>3+ His37</b> | <b>4+ His37</b> |
|-------------------------------------|----------|-----------------|-----------------|-----------------|
| <b>extraviral<br/>(above His37)</b> | total    | 40.5 ± 4.5      | 38.3 ± 4.6      | 40.5 ± 4.5      |
|                                     | outwards | 31.4 ± 4.1      | 26.6 ± 4.0      | 28.3 ± 4.0      |
|                                     | inwards  | 9.1 ± 2.7       | 11.7 ± 3.0      | 12.2 ± 3.0      |
| <b>intraviral<br/>(below His37)</b> | total    | 48.1 ± 5.9      | 42.4 ± 6.0      | 49.0 ± 6.1      |
|                                     | outwards | 23.5 ± 4.3      | 14.5 ± 4.0      | 13.1 ± 3.8      |
|                                     | inwards  | 24.6 ± 4.9      | 27.8 ± 5.2      | 35.9 ± 5.7      |

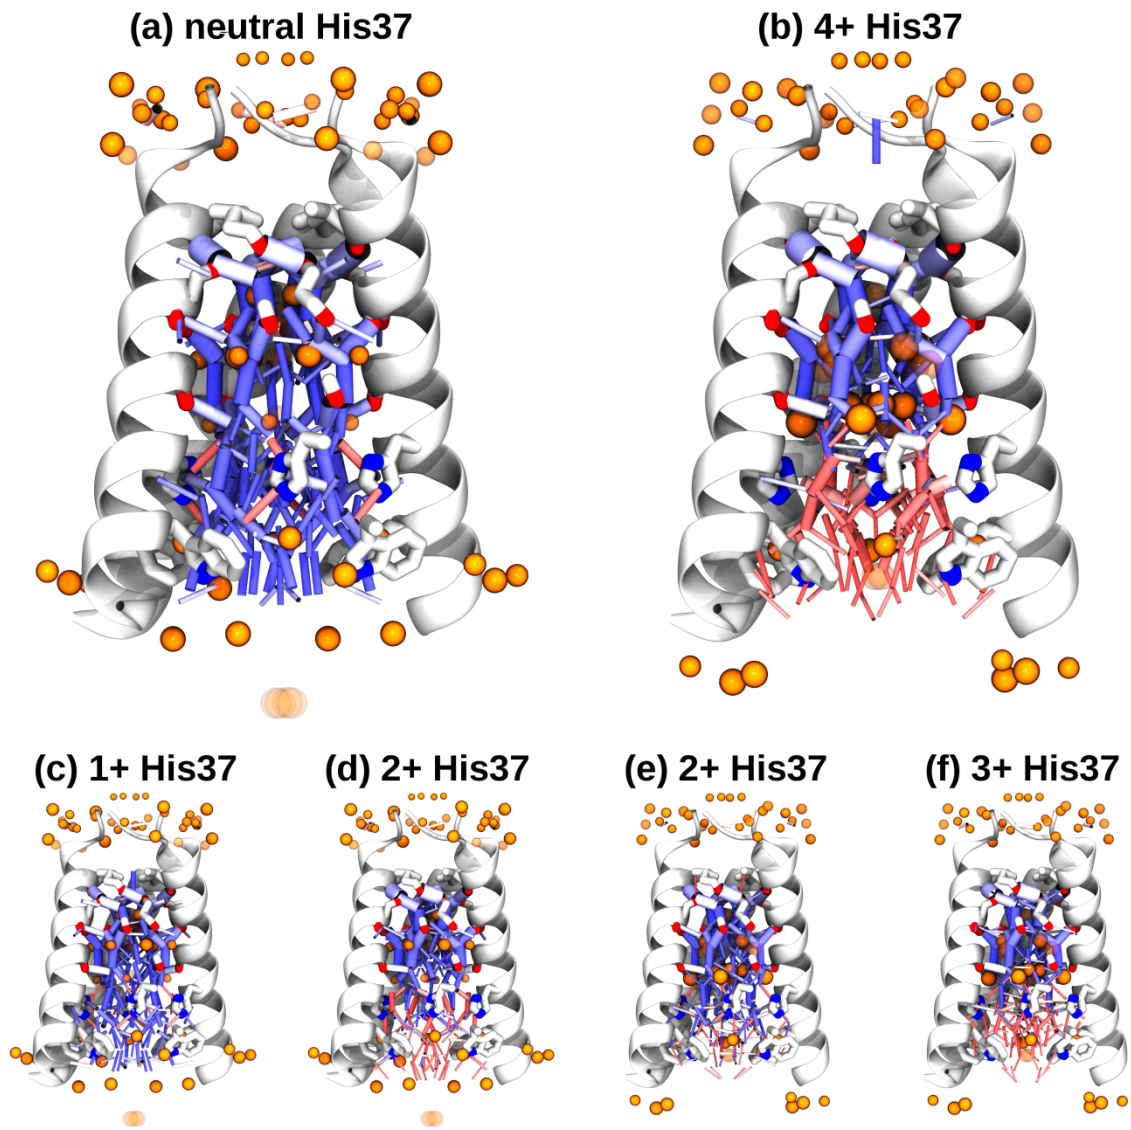

**Figure S20. Water wires calculated from the molecular dynamics simulations at different charge states of the His37 tetrad for the D44N mutant.** The oxygen atoms of the water molecules observed in the room temperature X-ray structures are shown as orange van der Waals spheres (orange color), with the diameter proportional to the crystallographic B-factors and transparency reflecting partial occupancy. Hydrogen bonds are represented as sticks, with a color scale denoting their orientation (see panels a-d), and thickness proportional to their population. **a** and **c-d**, Water wires for the 0, 1+ and 2+ charge states, respectively, for the production simulations starting from the cryogenic high pH crystal structure (PDB entry 4QK7). **b** and **d-e**, Water wires at the 4+, 2+ and 3+ charge states, respectively, for the production simulations starting from the cryogenic low pH crystal structure (PDB entry 4QKC).

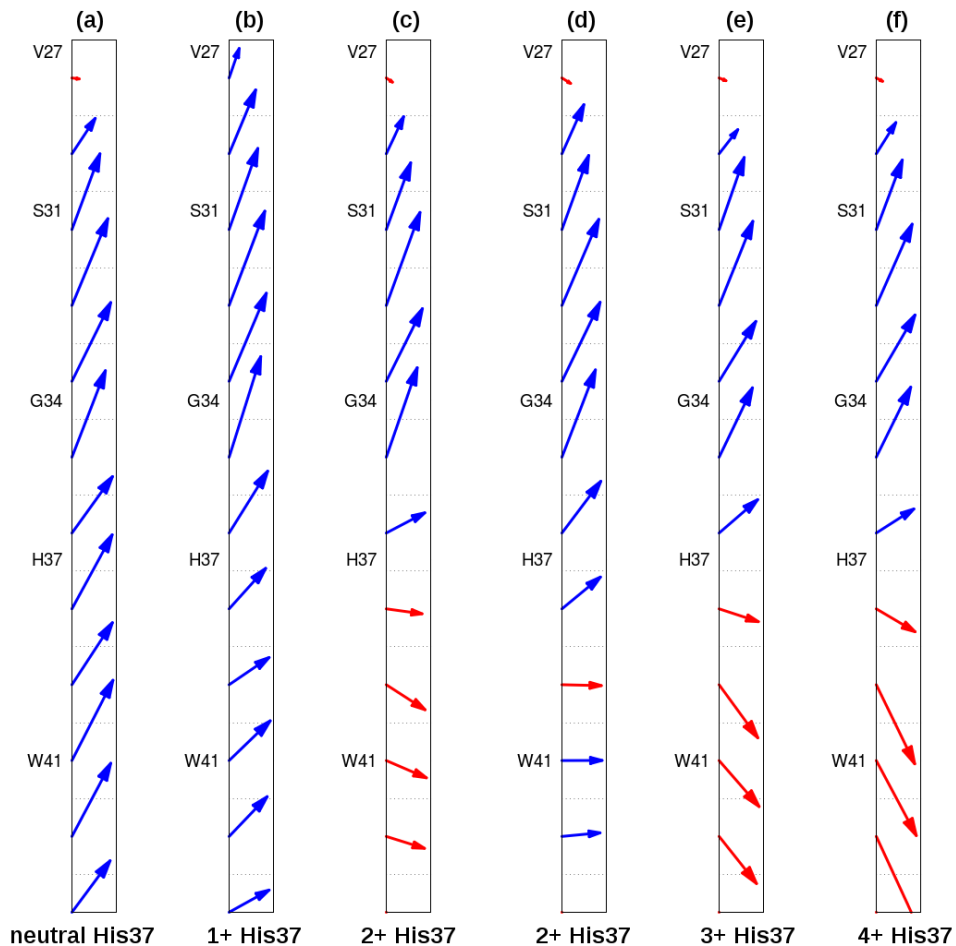

**Figure S21. Average hydrogen bond vectors along the M2 pore at different charge states of the His37 tetrad for the D44N mutant.** The vector direction reflects the net orientation with respect to the pore axis, with the H-bonds pointing to the exterior of the channel (outwards) colored in blue and the ones pointing to the viral interior (inwards) in red. The vector length is proportional to the magnitude of the net hydrogen bond (i.e. the longer, the larger the preference to be oriented in that direction). The hydrogen bonds are averaged over 2 Å bins along the pore axis (delimited by dashed black lines). **a-c**, Average hydrogen bond vectors at the 0, 1+, 2+ charge states, respectively, for the production simulations starting from the high pH cryogenic crystal structure (PDB entry 4QK7). **d-f**, Average hydrogen bond vectors at the 2+, 3+, 4+ charge states, respectively, for the production simulations starting from the low pH cryogenic crystal structure (PDB entry 4QKC).

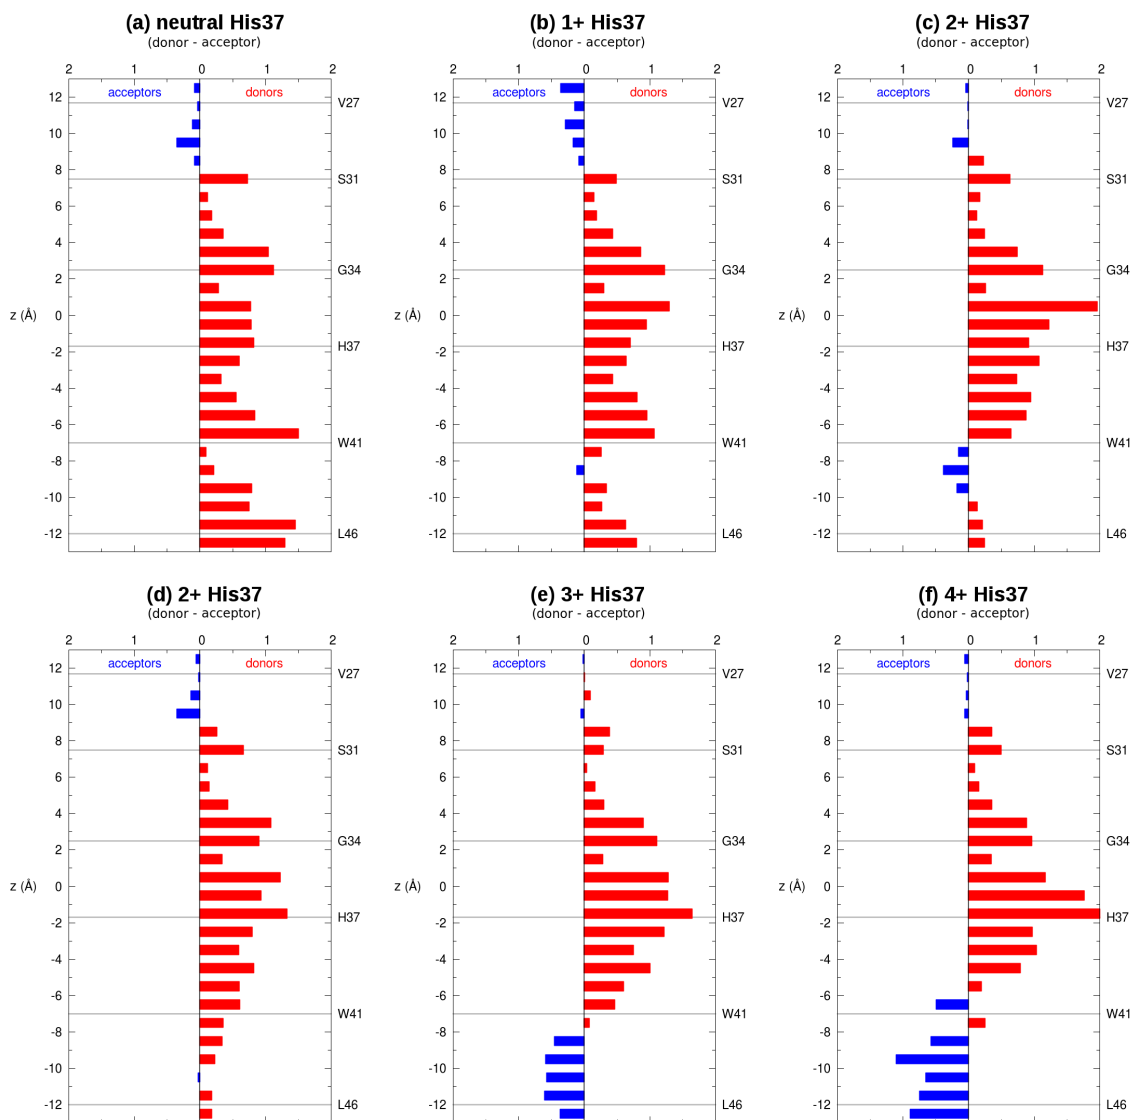

**Figure S22. Difference between the number of water molecules acting as hydrogen bond donors and acceptors at different charge states of the His37 tetrad for the D44N mutant.** The (*donor–acceptor*) difference along the M2 pore axis ( $z$ , in Å) is shown. Red bars represent a net number of donors at that pore position and blue bars a net number of acceptors. The position of the pore-lining M2 residues ( $C_{\alpha}$  atom of Val27, Ser31, Gly34, His37, Trp41 and Leu46) is indicated by horizontal grey lines. *Top: a–c*, Difference (*donor–acceptor*) at the 0, 1+ and 2+ charge states, respectively, for the production simulations starting from the cryogenic high pH crystal structure (PDB entry 4QK7). *d–f*, Difference (*donor–acceptor*) at the 2+, 3+ and 4+ charge states, respectively, for the production simulations starting from the cryogenic low pH crystal structure (PDB entry 4QKC).

**Table S5.** Comparison of the C $\alpha$  RMSD and  $p$  values along the MD simulations of wild-type, S31N and D44N M2TM.

| <i>4QKC-based simulations</i> |                 |                 |                 |
|-------------------------------|-----------------|-----------------|-----------------|
| <b>RMSD (Å)</b>               | <b>2+ His37</b> | <b>3+ His37</b> | <b>4+ His37</b> |
| <b>wild-type</b>              | 0.77 ± 0.07     | 0.63 ± 0.06     | 0.76 ± 0.07     |
| <b>S31N</b>                   | 0.65 ± 0.07     | 0.67 ± 0.06     | 0.81 ± 0.07     |
| <b>D44N</b>                   | 0.79 ± 0.15     | 1.04 ± 0.18     | 0.70 ± 0.07     |
| <i>p</i>                      | <b>2+ His37</b> | <b>3+ His37</b> | <b>4+ His37</b> |
| <b>wild-type</b>              | 0.60 ± 0.02     | 0.67 ± 0.02     | 0.63 ± 0.02     |
| <b>S31N</b>                   | 0.66 ± 0.02     | 0.68 ± 0.02     | 0.64 ± 0.02     |
| <b>D44N</b>                   | 0.60 ± 0.04     | 0.55 ± 0.04     | 0.62 ± 0.02     |

| <i>4QK7-based simulations</i> |                      |                 |                 |
|-------------------------------|----------------------|-----------------|-----------------|
| <b>RMSD (Å)</b>               | <b>neutral His37</b> | <b>1+ His37</b> | <b>2+ His37</b> |
| <b>wild-type</b>              | 0.75 ± 0.13          | 0.75 ± 0.07     | 1.09 ± 0.09     |
| <b>S31N</b>                   | 0.76 ± 0.06          | 0.72 ± 0.07     | 1.27 ± 0.08     |
| <b>D44N</b>                   | 0.56 ± 0.06          | 0.75 ± 0.10     | 0.65 ± 0.07     |
| <i>p</i>                      | <b>2+ His37</b>      | <b>3+ His37</b> | <b>4+ His37</b> |
| <b>wild-type</b>              | 0.60 ± 0.02          | 0.67 ± 0.02     | 0.63 ± 0.02     |
| <b>S31N</b>                   | 0.66 ± 0.02          | 0.68 ± 0.02     | 0.64 ± 0.02     |
| <b>D44N</b>                   | 0.60 ± 0.04          | 0.55 ± 0.04     | 0.62 ± 0.02     |

## Experimental methods:

### Synthesis and purification of M2(22-46)

The peptide construct used in this study is M2(22-46) from influenza A/Udorn/307/1972. The peptide was synthesized on Rink Amide resin using a Quest 210 peptide synthesizer (Argonaut Technologies) at a temperature of 75°C for deprotection and coupling steps. Each residue was deprotected in a solution of 5% w/w piperazine and 0.1 M HOBt. For each coupling reaction, 5 molar equivalents of amino acid were pre-activated with 5 equivalents of HCTU and 10 equivalents of DIEA then this pre-activated mixture was added to the resin. After all of the amino acids were added to the resin, the reaction was cooled to 20°C and the N-terminus of the peptide was acylated by the addition of 20 equivalents of acetic anhydride and 40 equivalents of DIEA. The resin was washed with DCM and hexane then the peptide was cleaved from the resin in a mixture of 94% v/v TFA, 5% TES, and 1% H<sub>2</sub>O. The resin was filtered out from the peptide-containing cleavage solution and washed with TFA, the excess TFA was blown off with a stream of nitrogen gas, then the peptide was precipitated into ether that had been chilled with dry ice. The mass of the resulting cleavage products was then confirmed by MS on a 3200 Q Trap LC/MS/MS (AB Sciex).

The peptide was purified using reverse-phase HPLC on a Varian ProStar purification system using a PROTO300 C4 10 μm column (Higgins Analytical Inc.). A gradient combining buffers A (99.9% water and 0.1% TFA) and B' (60% isopropanol, 30% acetonitrile, 10% water, 0.1% TFA) was used to separate and elute the peptide. A high degree of purity was necessary for the crystallization trials; analytical HPLC was used to confirm the degree of purity. The fractions of purified peptide were pooled and dissolved in ethanol. The concentration of peptide in the ethanol stock was determined by measuring the sample's absorbance at 280nm, then the stock solutions of peptide dissolved in ethanol were stored at -80°C.

### Preparation of the lipidic cubic phase and crystallization

The lipidic cubic phase was prepared with some modifications to the protocol described by Caffrey and Cherezov<sup>1</sup>. Peptide stock containing  $4.0 \times 10^{-7}$  moles of peptide in ethanol was added to 60mg of monoolein, mixed, then lyophilized overnight. The resulting peptide/monoolein mixture was warmed to 40°C in a water bath and transferred to a gas-tight Hamilton 250 μL syringe. 50 mM octylglucopyranoside (OG) in water was added into the syringe at a ratio of 20 μL for every 30 mg transferred sample, then the sample was then re-heated to 40°C and connected to a second gas-tight Hamilton syringe using a metal syringe coupler. The sample was pushed back and forth through the syringe coupler to mix; the appearance of the sample became transparent and homogenous after 1-2 minutes of transfer between the two syringes via the syringe coupler.

Crystallization conditions were screened in 96-well plastic plates (Molecular Dimensions) that were set up with a LCP crystallization robot (Anachem) using a protocol that combined 100 nL of monoolein/peptide sample with 1000 nL of screening solution. Square-shaped crystals belonging to space group I<sub>4</sub> formed after 2-4 weeks of incubation at 10°C. These conditions were optimized to grow 20-120 μm large crystals using the Hampton Additive screen. The crystals used for data collection at cryogenic conditions were grown in 96-well plates at 10°C then observed and harvested into liquid nitrogen in a 4°C cold room. The conditions that yielded the cryo high pH structure were: 0.18 M CaCl<sub>2</sub>, 0.09 M Tris pH 8.0, 39.6% v/v PEG 400, 0.01 M β-nicotinamide adenine dinucleotide hydrate additive; the conditions that yielded the cryo low pH structure were: 0.18 M CaCl<sub>2</sub>, 0.09 M MES pH 5.5, 39.6% v/v PEG 400, 5% v/v Jeffamine M-600 pH 7.0 additive in the presence of amantadine at a 4:1 ratio of Amt to tetramer, though density for the amantadine was not present in the crystal structure under these conditions and low pH crystals without amantadine yielded the same structure but at slightly lower resolution. Because of the high percentage of PEG 400 in the solution, no additional

cryoprotectant was added before the crystals were frozen and stored in liquid nitrogen. The crystals used for room temperature data were grown in 96-well plates at 20°C then were observed, transported to the beam line and harvested at ambient temperature. The conditions that yielded the room temperature high pH structure were: 0.18 M CaCl<sub>2</sub>, 0.09 M Tris pH 8.0, 39.6% v/v PEG 400, 3% w/v xylitol additive; the conditions that yielded the room temperature low pH structure were: 0.18 M CaCl<sub>2</sub>, 0.09 M MES pH 5.5, 39.6% v/v PEG 400, 0.01 M MnCl<sub>2</sub> · 4H<sub>2</sub>O additive.

### **Data collection**

All crystallographic data was collected at the Advanced Light Source on beam 8.3.1. The beam size was 100 μm for all data sets; the detector used was a 3 x 3 CCD array (ADSC Q315r). Data from the two cryo condition crystals that diffracted to 1.1 Å were collected at a temperature of < 100K with a 13.0 keV beam and a detector-to-sample distance of 125 mm. The high pH cryo condition crystal (PDB entry 4QK7) was exposed to the beam for 6 seconds per frame and the low pH cryo condition crystal (PDB entry 4QKC) was exposed for 4 seconds per frame; both crystals were oscillated 1 degree during data collection. The room temperature data was collected at 273 K using room temperature data collection techniques; with a 11.111 keV beam and an aluminum foil attenuator for both data sets. The crystals were looped at the beam line and a MiTeGenMicroRT plastic capillary containing 8 μL of precipitant solution mixed with 2 μL deionized water was placed on top of the goniometer base to hydrate the crystals during data collection. The crystals accumulated radiation damage faster under room temperature diffraction conditions, so larger crystals (50-120 μm) had to be diffracted to obtain complete data sets. The low pH room temperature condition crystal (PDB entry 4QKM) was exposed to the beam for 3 seconds per frame with a detector-to-sample distance of 125 mm; the high pH room temperature condition crystal (PDB entry 4QKL) was exposed to the beam for one second per frame with a detector-to-sample distance of 150 mm; both crystals were oscillated 1 degree during data collection. The data used to solve the room temperature structures was limited to the first 60 frames to minimize the effects of radiation damage on data quality.

### **Data processing, phasing and refinement**

Data processing was done in iMosflm<sup>2</sup>. Phasing was done by molecular replacement in the Phenix suite using Phaser MR<sup>3</sup> with chain A from PDB entry 3C9J<sup>4</sup> as a search model, then refinement was carried out in Phenix Refine<sup>5</sup>. Protein model manipulation and addition of water and ions were done in Coot<sup>6</sup>, and monoolein molecules were manually fit into Fo-Fc density using both Coot and PyMol<sup>7</sup>. Alternate conformers were predicted using the qFit web server<sup>8</sup> and Ringer<sup>9</sup>, and were also manually added where positive Fo-Fc density indicated they were present. Anisotropic B-factors were used for both cryo conditions (PDB entries 4QK7 and 4QKC) and the low pH room temp condition (PDB entry 4QKM) but not the high pH room temp condition (PDB entry 4QKL).



## Molecular dynamics simulation details

Classical molecular dynamics (MD) simulations of the hydrated protein crystal were performed to study the network of water molecules confined inside the M2 pore and its response to pH changes (i.e. the protonation state of His37). The initial configurations were built using the two cryo X-ray structures of the transmembrane region of the M2 bundle (M2TM, spanning residues 22-46) reported in this work (4QK7 and 4QKC, at high and low pH, respectively). In order to model the  $I_4$  symmetry of the crystal, two staggered tetramers were included in the simulation box (see Supplementary Fig. S3), as well as the crystallographically resolved water molecules, monoolein molecules and calcium and chloride ions. Each of the four cryoprotectant molecules found inside the pore in the X-ray structures was replaced by two water molecules, occupying the same position of the two hydroxyl groups of ethylene glycol. The disordered lipidic phase was modeled as heptane, which provides a hydrophobic phase similar to monoolein with the advantage of faster equilibration, in the spirit of the highly mobile membrane mimetic used in another study<sup>10</sup>. A thin layer of water molecules was also added to fill out the unresolved hydrophilic region between the two tetramers, along with additional chloride ions to achieve neutrality. Simulations were performed starting from either the structure solved at low pH or the one at high pH (pH 5.5 and 8.0, respectively) for the five possible protonation states of the His37 tetrad (0, +1, +2, +3 and +4). The neutral histidine residues were set in the  $\epsilon$ -tautomeric state and the histidine charge was increased by protonating one, two (non-adjacent), three or all four histidines, respectively, for each of the two tetramers. Each of the ten resulting systems consists of  $\sim 7,000$  atoms.

The protein was modeled using the CHARMM force field<sup>11,12</sup> with CMAP corrections<sup>13</sup> and the water molecules were described using the TIP3P model<sup>14</sup>. The parameters by Roux and coworkers were used for the chloride<sup>15</sup> and calcium<sup>16</sup> ions. The heptane parameters were taken from the alkane force field<sup>17,18</sup>. Mono-olein was parameterized using the CHARMM General Force Field (CGenFF, version 2b7)<sup>19</sup> and the ParamChem server (version 0.9.6 beta)<sup>20-22</sup>.

The simulations were performed in the NVT ensemble using the measured crystal lattice dimensions (29.310 Å x 29.310 Å x 67.310 Å for the low pH structure and 29.536 Å x 29.536 Å x 66.853 Å for the high pH) and applying periodic boundary conditions to mimic the crystal environment. Electrostatic interactions were calculated using the particle mesh Ewald (PME) method<sup>23</sup>, with a real space spherical cutoff of 12 Å, an accuracy threshold of  $10^{-6}$  and a fast Fourier transform (FFT) grid spacing of 0.8 Å (x and y dimensions) or 0.9 Å (z). Lennard-Jones interactions were cut off at 12 Å, with a switching function starting from 10 Å. The equations of motion were solved with the velocity Verlet integrator using a time step of 1.0 fs (equilibration) or 2.0 fs (production runs). The lengths of the bonds involving hydrogen atoms were constrained with the SHAKE method<sup>24</sup>. Each system was run at 310 K using a Langevin temperature coupling scheme<sup>25</sup>, with a thermostat decay time of 1 ps.

The low pH and high pH structures (in the +4 and 0 protonation states, respectively) were pre-equilibrated for  $\sim 20$  ns by applying harmonic restraining potentials on the position of the non-hydrogen atoms of the peptide backbone, the monoolein molecules and the crystallographic water and ions. The force constant (k) of the harmonic restraints was progressively reduced (from 20 to 2 kcal mol<sup>-1</sup> Å<sup>-2</sup> for the protein, from 10 to 4 kcal mol<sup>-1</sup> Å<sup>-2</sup> for the crystallographic water molecules and from 10 to 1 kcal mol<sup>-1</sup> Å<sup>-2</sup> for the other X-ray-derived moieties) in 0.5 ns steps. The resulting pre-equilibrated configurations of the 4+ and 0 states were used to build the initial models for the other protonation states. Upon change of the His 37 charge, each system was relaxed for  $\sim 10$  ns using harmonic restraining potentials (with k = 2 kcal mol<sup>-1</sup> Å<sup>-2</sup> for the protein backbone, 4 kcal mol<sup>-1</sup> Å<sup>-2</sup> for the crystallographic water molecules and 1 kcal mol<sup>-1</sup> Å<sup>-2</sup> for monoolein and the X-ray derived ions). Then all harmonic restraints were released<sup>26</sup> and a production trajectory of  $\sim 300$ -450 ns was sampled for each system. All the MD simulations were performed with NAMD (version 2.9)<sup>27</sup>. The stability of the



tetramer along the MD simulations was confirmed by examining the root mean square deviation (RMSD) of the C $\alpha$  atoms (see Supplementary Fig. S4).

### Setup of the S31N mutant simulations

Classical MD simulations were performed for the S31N mutant of M2TM in order to assess the effect of the mutation in the number and directionality of the water wires inside the M2 pore. S31N is the most prevalent M2 mutation in circulating viruses and confers amantadine resistance while retaining conduction properties similar to wild-type M2. The initial configurations were built using equilibrated snapshots of the wild-type simulations and mutating *in silico* the residue at position 31 from serine to asparagine. The asparagine side chain was initialized in the same rotameric state as the NMR structure of the M2TM complex with thiophenyl-isoxazole-amantadine ( $\chi_1 \approx -70^\circ$  and  $\chi_2 \approx -30^\circ$ ; PDB code 2LY0). However, after a few nano seconds, it rotates and adopts a different rotameric state, with the amide group perpendicular to the pore axis ( $\chi_1 \approx -80^\circ$  and  $\chi_2 \approx -90^\circ$ ), and this conformation remains stable for the rest of the simulation.

The details of the classical MD simulations of the S31N mutant are identical to the wild-type. S31N M2TM was considered in each of the 5 possible protonation states of the His37 tetrad (0, 1+, 2+, 3+ and 4+). After an initial 20 ns equilibration with the protein backbone restrained, a production trajectory was sampled for 330 ns; only the last 250 ns were considered for the analysis. The stability of the mutant along the MD simulations was confirmed by examining the RMSD of the C $\alpha$  atoms (Fig. S11). Moreover, the protein conformation was maintained during the MD simulations, as can be seen by the stability of the principal component *p* (Fig. S12).

### Setup of the D44N mutant simulations

Classical MD simulations were performed for the D44N mutant of M2TM in order to assess the effect of the loss of this C-terminal negative charge on the number and directionality of the water wires inside the M2 pore. The D44N mutation is present in the A/FPV/Rostock/34 influenza strain and results in enhanced proton conduction and loss of its asymmetry<sup>28</sup>. Moreover, in contrast to the S31N mutant, the D44N mutant is still sensitive to amantadine, since this residue is located far from the drug binding site.

The initial configurations were built using equilibrated snapshots of the wild-type simulations and mutating *in silico* the residue at position 44 from aspartate to asparagine using the *Mutator* plugin of VMD<sup>32</sup>. Four chloride ions were also added for each tetramer in order to maintain neutrality. The details of the classical MD simulations of the D44N mutant are identical to the wild-type. D44N M2TM was considered in each of the 5 possible protonation states of the His37 tetrad (0, 1+, 2+, 3+ and 4+). After an initial 20 ns equilibration with the protein backbone restrained, a production trajectory was sampled for 330 ns; only the last 250 ns were considered for the analysis. The stability of the mutant along the MD simulations was confirmed by examining the RMSD of the C $\alpha$  atoms (Fig. S17). In addition, the partially dilated C-terminal protein conformation was maintained during the MD simulations (Fig. S18). The larger fluctuations of the protein backbone compared to the wild-type and the S31N mutant simulations (Table S5) are probably due to the modification of the protein-protein contacts of the crystal lattice, in which residue 44 is involved. Nevertheless, the structure of D44N M2TM is not significantly altered compared to the wild-type.

## Analysis of the MD simulations

*Principal component analysis.* The protein backbone conformation of the crystallographic structures presented in this work lies between the C-terminal closed and dilated structures previously solved by X-ray or NMR (see main text). To characterize the backbone conformation of M2TM, we used the principal component  $p$  introduced in reference<sup>28</sup>. In short, we computed difference vectors between each of the cryostructures in this work (either at low or at high pH, PDB entries 4QKC and 4QK7, respectively) and the X-ray structure solved at intermediate pH by Acharya and coworkers (PDB entry 3LBW<sup>29</sup>), using the backbone coordinates of M2TM. Then we calculated the scalar product of this vector and the difference vector between the same intermediate pH structure<sup>29</sup> and the X-ray structure solved at low pH by Stouffer et al. (PDB entry 3C9J<sup>30</sup>). The resulting quantity is the principal component  $p$  and it indicates the fraction of C-terminally closed *versus* dilated conformation of each of the two cryostructures. The obtained  $p$  values are 0.72 (low pH) and 0.73 (high pH), indicating that the C-terminus of the current M2TM structures is partially dilated. Moreover, the partially dilated protein conformation is maintained during the MD simulations, as can be shown by the stability of  $p$  as a function of simulation time in Supplementary Fig. S5.

*Water densities.* Water densities were obtained from the MD simulations using the Volmap plugin<sup>31</sup> in VMD (version 1.9)<sup>32</sup>. Each water atom was treated as a normalized isotropic Gaussian density of width equal to 0.532 Å (oxygen) or 0.42 Å (hydrogen), that is their van der Waals radius scaled by 0.35. This radius scaling factor was chosen empirically by applying the Volmap plugin on the recently solved 0.88 Å resolution crystal structure of aquaporin<sup>33</sup>; the calculated density reproduces the experimental density when scaling the atomic radii by 0.35. Besides, this is in line with the electron density of water in simulations being 0.34 e Å<sup>3</sup> for TIP3P waters<sup>34</sup>. The density was weighted by the atomic number ( $z = 8$  or  $1$ , respectively) and summed over all the pore waters using a three dimensional grid with a 0.25 Å bin resolution. The time average was taken over the last ~250 ns of the MD trajectories. Four-fold rotational symmetry was enforced by recalculating the water density after each of the four 90 degree rotations along the pore axis of the homotetramer and averaging the four resulting density maps. The obtained MD water densities are shown in Fig. 3a and Supplementary Fig. S2.

*Populations of hydrogen bonds in the M2 pore.* We calculated the populations of hydrogen-bonded water molecules using the following clustering protocol. We defined a hydrogen-bond vector between a donor and an acceptor when the two oxygen atoms are at a distance less than 3.5 Å and the donor-hydrogen-acceptor angle is between 150°-180°. Four-fold rotational symmetry was enforced by recalculating the hydrogen-bond vectors after each of the four 90 degree rotations along the pore axis of the homotetramer. We calculated the clusters of these vectors using `g_cluster` (version 4.5.5)<sup>35</sup> over ~250 ns-long MD trajectories (i.e. the first 100 ns were considered as equilibration and discarded). We used a cutoff equal to 1.5 Å to define hydrogen bond vectors as belonging to the same cluster. To obtain the occupancy of a hydrogen bond represented by the centroid of one cluster, we divided the population of the cluster by the total number of MD frames and by 4 (to normalize upon symmetrization), such that the occupancy of a given hydrogen bond is at most 1. Fig. 4 and Supplementary Fig. S7 are produced by drawing cylinders corresponding to each cluster, with the thickness determined by the corresponding occupancy and the color indicating the orientation (blue for hydrogen bonds oriented towards the exterior of the channel and red if oriented towards the viral interior, see Supplementary Fig. S7). These figures were made with the VMD program (version 1.9)<sup>32</sup>.

*Density and orientation of hydrogen bonds.* The density (in Å<sup>-3</sup>) and orientation (in Å<sup>-2</sup>) of hydrogen bond vectors (Supplementary Fig. S6) were calculated over the last ~250 ns of MD trajectory as follows:

1. The frames of the MD simulation are aligned onto the crystal cryostructure (using the backbone

- atoms of residues 25-46 as reference) to remove diffusive motions of M2TM.
2. The oxygen atoms of all the water molecules forming hydrogen bonds with other water molecules or His37 in the M2 pore are selected and their two cylindrical coordinates ( $z$  and  $r$ ) are computed.  $z$  is the Cartesian coordinate that indicates the displacement along the pore axis (with origin on the center of mass of M2TM 25-46), whereas  $r$  is the radial distance from the pore axis.
  3. The corresponding hydrogen bond vectors  $hb(r,z)$  are calculated as the difference between the cylindrical coordinates of the acceptor and the donor.
  4. The density of hydrogen bond vectors  $n_{hb}(r,z)$  (shown in black in Supplementary Fig. S6) is computed as a two-dimensional histogram of the number of hydrogen bond vectors, with a grid of 0.2 Å spacing. Thereby, we are performing a cylindrical average over  $r$ , that is over the four M2 monomers. The orientation of hydrogen bond vectors  $n_{hb}(r,z)$  (shown in red and blue in Supplementary Fig. S6) is computed in a similar way, but considering the direction of the vector, so that a hydrogen bond has a positive contribution if oriented outwards or negative if oriented inwards.
  5. The two-dimensional histograms are normalized with weighting factor ( $\frac{1}{2}\pi r$ ) to allow a visual comparison of the density near the pore axis with respect to the density at large values of  $r$ , where atoms are more numerous for geometrical reasons.
  6. The normalized density is plotted using a color scale ranging from white ( $0 \text{ \AA}^{-3}$ ) to full black ( $0.05 \text{ \AA}^{-3}$ ), whereas for the normalized orientation color scale spans from full red ( $-0.025 \text{ \AA}^{-2}$ ) to white ( $0 \text{ \AA}^{-2}$ ) and then to full blue ( $+0.025 \text{ \AA}^{-2}$ ).

*Average number of hydrogen bonds.* We calculated the number of hydrogen bonds inside the M2 pore, averaged over the last ~250 ns of the MD trajectory. Only water-water and water-His37 hydrogen bonds were considered and they were classified as extraviral or intraviral depending on whether the donor and acceptor water oxygen atoms were above or below the His37 tetrad (i.e. extraviral if  $z$  (donor O) and  $z$  (acceptor O)  $> z$  (center of mass of the His37 tetrad) and intraviral if otherwise). Hydrogen bonds are oriented outwards if  $z$  (donor O)  $< z$  (acceptor O), whereas they are oriented inwards if  $z$  (donor O)  $> z$  (acceptor O). This analysis, shown in Supplementary Table S2, is intended to provide a more quantitative picture of the hydrogen bond population displayed in Fig. 4 and Supplementary Fig. S7.

*Average hydrogen bond vectors along the M2 pore axis.* We calculated the average hydrogen bond vectors along the pore axis ( $z$ ) using the hydrogen bond vectors expressed in spherical coordinates  $hb(r,z)$ , calculated as explained above. These individual vectors were averaged over the last ~250 ns of the MD trajectory and over 2 Å bins along the pore axis;  $hb(r,z)$  is considered to belong to a certain  $z$  slab if the floor of  $z$  (donor O) =  $z$  (slab). The resulting average vectors are shown in Supplementary Fig. S8. Their direction reflects the orientation with respect to the pore axis (i.e. upwards indicates a net number of hydrogen bonds directed towards the exterior of the channel and downwards towards the viral interior), whereas their length is proportional to the magnitude of the net hydrogen bond vector (i.e. the longer, the larger the preference to be oriented in that direction). These average hydrogen bond vectors (Supplementary Fig. S8) present a one-dimensional, more simplified picture of the two-dimensional histograms in Supplementary Fig. S6.

*Average number of donors and acceptors along the pore.* We calculated the difference between the number of water molecules acting as hydrogen bond donors and acceptors along the pore axis  $z$ . Compared to the previous analyses, in which we calculated only the water-water and water-His37 hydrogen bond vectors, here we calculated the number of water molecules donating or accepting hydrogen bonds to or from other water molecules and the protein (i.e. carbonyl oxygen atoms, Ser31 hydroxyl group or Asn31 amide group and His37 imidazole). The (*donor*– *acceptor*) difference is

averaged over the last ~250 ns of the MD trajectory and over 2 Å bins along the pore axis; a water molecule is considered to belong to a certain  $z$  slab if the floor of  $z$  (oxygen atom) =  $z$  (slab). The average differences along  $z$  are shown as bar graphs in Supplementary Fig. S9. A red bar indicates a net number of water molecules acting as H-bond donors, whereas a blue bar represents a net number of water molecules acting as H-bond acceptors.

### Control simulations

Besides the production MD described above, we also performed control simulations with all X-ray derived water molecules restrained at their crystallographic positions. Two types of control simulations were run:

1. “restrained” simulations, in which the cryogenic X-ray structures at high and low pH (PDB entries 4QK7 and 4QKC, respectively) were simulated while applying a restraining harmonic potential on the oxygen atoms of the crystallographic water molecules;
2. “swapped” simulations, where the crystallographic water molecules in the cryogenic high pH structure (PDB entry 4QK7) were replaced by those of the low pH structure (PDB entry 4QKC), and vice versa; the resulting chimeric systems were simulated using a harmonic restraining potential on the grafted water molecules.

The harmonic force constant ( $k$ ) used in both types of control simulations is  $4 \text{ kcal mol}^{-1} \text{ \AA}^{-2}$  (that is, each water oxygen atom can fluctuate  $\pm 0.5 \text{ \AA}$  around its experimental position), except for water molecules 35 and 47 in the high pH structure, for which  $k = 1 \text{ kcal mol}^{-1} \text{ \AA}^{-2}$  ( $\pm 1.1 \text{ \AA}$  oscillations). Water 35 of one M2TM monomer is only  $1.26 \text{ \AA}$  apart of water 47 of another monomer, and either of them can form a H-bond with water 36, indicating that the water sites 35 and 47 are alternatively occupied. The rest of the simulation details are the same as for the production MD (see above). Control simulations were run for all five possible protonation states of the His37 tetrad (0, 1+, 2+, 3+ and 4+) and a trajectory of ~120 ns was sampled for each system. For each control simulation, the first ~20 ns were discarded as equilibration and the population of hydrogen bonds was calculated on the last ~100 ns, following the same clustering protocol as for the production simulations (see above). The obtained water wires are shown in Supplementary Fig. S10.

The distribution of H-bond donors and acceptors in the restrained simulations (Supplementary Fig. S10, panels a-d) is nearly identical to the production MD (Fig. 4 and Supplementary Fig. S7). Therefore, the computational water model (TIP3P<sup>14</sup>) is able to accurately predict the hydrogens' positions, despite the slight differences between the experimental and calculated water densities. On the other hand, the orientation of hydrogen bonds in the restrained simulations (Supplementary Fig. S10, panels a-d) is almost indistinguishable from the swapped simulations (Supplementary Fig. S10, panels e-h). This indicates that the hydrogen bond orientation does not depend on the precise position of the water molecules, and it is determined only by the charge state of the His37 tetrad.

## References

- 1 Caffrey, M. & Cherezov, V. Crystallizing membrane proteins using lipidic mesophases. *Nat. Protoc.* **4**, 706-731, doi:10.1038/nprot.2009.31 (2009).
- 2 Battye, T. G. G., Kontogiannis, L., Johnson, O., Powell, H. R. & Leslie, A. G. W. iMOSFLM: a new graphical interface for diffraction-image processing with MOSFLM. *Acta Crystallogr. Sect. D-Biol. Crystallogr.* **67**, 271-281, doi:10.1107/s0907444910048675 (2011).
- 3 McCoy, A. J. *et al.* Phaser crystallographic software. *J. Appl. Crystallogr.* **40**, 658-674, doi:10.1107/s0021889807021206 (2007).
- 4 Stouffer, A. L. *et al.* Structural basis for the function and inhibition of an influenza virus proton channel. *Nature* **451**, 596-U513, doi:10.1038/nature06528 (2008).
- 5 Adams, P. D. *et al.* PHENIX: a comprehensive Python-based system for macromolecular structure solution. *Acta Crystallogr. Sect. D-Biol. Crystallogr.* **66**, 213-221, doi:10.1107/s0907444909052925 (2010).
- 6 Emsley, P., Lohkamp, B., Scott, W. G. & Cowtan, K. Features and development of Coot. *Acta Crystallogr. Sect. D-Biol. Crystallogr.* **66**, 486-501, doi:10.1107/s0907444910007493 (2010).
- 7 Schrodinger, LLC. *The PyMOL Molecular Graphics System, Version 1.3r1* (2010).
- 8 van den Bedem, H., Dhanik, A., Latombe, J. C. & Deacon, A. M. Modeling discrete heterogeneity in X-ray diffraction data by fitting multi-conformers. *Acta Crystallogr. Sect. D-Biol. Crystallogr.* **65**, 1107-1117, doi:10.1107/s0907444909030613 (2009).
- 9 Lang, P. T. *et al.* Automated electron-density sampling reveals widespread conformational polymorphism in proteins. *Protein Sci.* **19**, 1420-1431, doi:10.1002/pro.423 (2010).
- 10 Ohkubo, Y. Z., Pogorelov, T. V., Arcario, M. J., Christensen, G. A. & Tajkhorshid, E. Accelerating membrane insertion of peripheral proteins with a novel membrane mimetic model. *Biophys. J.* **102**, 2130-2139 (2012).
- 11 MacKerell, Jr., A. D., Bashford, D., Bellot, M., Dunbrack, R. L. Jr, Evanseck, J. D., Field, M. J., Fischer, S., Gao, J., Guo, H. & Ha S. All-atom empirical potential for molecular modeling and dynamics studies of proteins. *J. Phys. Chem. B* **102**, 3586-3616 (1998).
- 12 MacKerell, Jr., A. D., Feig, M. and Brooks, III, C. L. Improved treatment of the protein backbone in empirical force fields. *J. Am. Chem. Soc.* **126**, 698-699 (2004).
- 13 Best, R. B., Zhu, X., Shim, J., Lopes, P., Mittal, J., Feig, M. and MacKerell, Jr., A. D.. Optimization of the additive CHARMM all-atom protein force field targeting improved sampling of the backbone phi, psi and sidechain chi1 and chi2 dihedral angle. *J. Chem. Theory Comput.* **8**, 3257-327 (2012).

- 14 Jorgensen, W. L., Chandrasekhar, J., Madura, J. D., Impey, R. W. & Klein, M. L. Comparison of simple potential functions for simulating liquid water. *J. Chem. Phys.* **79**, 926–935 (1983).
- 15 Beglov, D. & Roux, B. Finite Representation of an infinite bulk System: solvent boundary potential for computer simulations. *J. Chem. Phys.* **100**, 9050-9063 (1994).
- 16 Marchand, S. & Roux, B. Molecular dynamics study of calbindin D9k in the apo and singly and doubly calcium-loaded states. *Proteins*, **33**, 265–284 (1998).
- 17 Klauda, J. B., Venable, R. M., Freites, J. A., O'Connor, J. W., Tobias, D. J., Mondragón-Ramírez, C., Vorobyov, I., MacKerell, Jr., A. D. & Pastor, R. W. Update of the CHARMM all-atom additive force field for lipids: validation on six lipid types. *J. Phys. Chem. B* **114**, 7830-7843 (2010).
- 18 Lee, S., Tran, A., Allsopp, M., Lim, J. B., Hénin, J. & Klauda, J. B. CHARMM36 united-atom chain model for lipids and surfactants. *J. Phys. Chem. B* **118**, 547–556 (2014).
- 19 Vanommeslaeghe, K., Hatcher, E., Acharya, C., Kundu, S., Zhong, S., Shim, J., Darian, E., Guvench, O., Lopes, P., Vorobyov, I. & Mackerell, Jr., A. D. CHARMM general force field: a force field for drug-like molecules compatible with the CHARMM all-atom additive biological force fields. *J. Comput. Chem.* **31**, 671–90 (2009).
- 20 Vanommeslaeghe, K. & MacKerell, Jr., A. D. Automation of the CHARMM General Force Field (CGenFF) I: bond perception and atom typing, *J. Chem. Inf. Model.* **52**, 3144-3154 (2012).
- 21 Vanommeslaeghe, K., Raman, E. P. & MacKerell, Jr., A. D. Automation of the CHARMM General Force Field (CGenFF) II: Assignment of bonded parameters and partial atomic charges, *J. Chem. Inf. Model.* **52**, 3155-3168 (2012).
- 22 [www.paramchem.org](http://www.paramchem.org)
- 23 Essman, U., Perera, L., Berkowitz, M. L., Darden, T., Lee, H. & Pedersen, L. G. A smooth particle mesh Ewald method. *J. Chem. Phys.* **103**, 8577–8592 (1995).
- 24 Ryckaert, J.-P., Ciccotti, G. & Berendsen, H. J. C. Numerical integration of the cartesian equations of motion of a system with constraints: molecular dynamics of N-alkanes. *J. Comput. Phys.* **23**, 327– 341 (1977).
- 25 Adelman, S. A. & Doll, J. D. Generalized Langevin equation approach for atom/solid-surface scattering: General formulation for classical scattering off harmonic solids. *J. Chem. Phys.* **64**, 2375-2388 (1976).
- 26 Previous simulations of M2-TM in a membrane (Wei, C. & Pohorille, A. Activation and proton transport mechanism in influenza A M2 channel. *Biophys. J.* **105**, 2036-2045 (2013) and Gkeka, P., Eleftheratos, S., Kolocouris, A. & Cournia, Z. Free energy calculations reveal the origin of binding preference for aminoadamantane blockers of influenza. *J. Chem. Theory Comput.* **9**, 1272-1281 (2013)) have shown that anions, such as chloride, can access the interior of the M2 pore. In our crystal environment simulations, entrance of Cl<sup>-</sup> is overestimated due to



the limited volume of water between the two staggered tetramers. Therefore, we have used a wall-like restraining potential to penalize the presence of chloride ions inside the pore and thus sample the pore hydration without anion-induced perturbations.

- 27 Phillips, J. C., Braun, R., Wang, W., Gumbart, J., Tajkhorshid, E., Villa, E., Chipot, C., Skeel, R. D., Kalé, L. & Schulten, K. Scalable molecular dynamics with NAMD. *J. Comput. Chem.* **26**, 1781-1802 (2005).
- 28 Ma, C., Fiorin, G., Carnevale, V., Wang, J., Lamb, R. A., Klein, M. L., Wu, Y., Pinto, L. H. & DeGrado, W. F. Asp44 stabilizes the Trp41 gate of the M2 proton channel of influenza A virus. *Structure* **21**, 2033-2041 (2013).
- 29 Acharya, R., Carnevale, V., Fiorin, G., Levine, B.G., Polishchuk, A.L., Balannik, V., Samish, I., Lamb, R.A., Pinto, L.H., DeGrado, W.F. & Klein, M.L. Structure and mechanism of proton transport through the transmembrane tetrameric M2 protein bundle of the influenza A virus. *Proc. Natl. Acad. Sci. USA* **107**, 15075-15080 (2010).
- 30 Stouffer, A.L., Acharya, R., Salom, D., Levine, A.S., Costanzo, L.D., Soto, C.S., Tereshko, V., Nanda, V., Stayrook, S. & DeGrado, W.F. Structural basis for the function and inhibition of an influenza virus proton channel. *Nature* **451**, 596-600 (2008).
- 31 Cohen, J., Arkhipov, A., Braun, R. & Schulten, K. Imaging the migration pathways for O<sub>2</sub>, CO, NO, and Xe inside myoglobin." *Biophysical Journal* **91**, 1844-1857 (2006).
- 32 Humphrey, W., Dalke, A. & Schulten, K. VMD-Visual Molecular Dynamics. *J. Mol. Graphics* **14**, 33-38 (1996).
- 33 Kosinska Eriksson, U., Fischer, G., Friemann, R., Enkavi, G., Tajkhorshid, E. & Neutze, R. Subangstrom resolution X-ray structure details aquaporin-water interactions. *Science*. **340**, 1346-1349 (2013).
- 34 Klauda, J. B., Kucerka, N., Brooks, B. R., Pastor, R. W. & Nagle, J. F. Simulation-based methods for interpreting X-ray data from lipid bilayers. *Biophys. J.* **90**, 2796-2807 (2006).
- 35 Daura, X., Gademann, K., Jaun, B., Seebach, D., van Gunsteren, W. F. & Mark, A. E. Peptide folding: when simulation meets experiment. *Angew. Chem. Int. Ed.* **38**, 236-240 (1999).
